## **Characterizing the genetic basis of copper toxicity in *Drosophila* reveals a complex pattern of allelic, regulatory, and behavioral variation**

Elizabeth R. Everman<sup>1</sup>, Kristen M. Cloud-Richardson<sup>1</sup>, Stuart J. Macdonald<sup>1,2</sup>

<sup>1</sup>Department of Molecular Biosciences, University of Kansas, 1200 Sunnyside Avenue, Lawrence, KS 66045, USA

<sup>2</sup>Center for Computational Biology, University of Kansas, 2030 Becker Drive, Lawrence, KS 66047

Running title: Genetic basis of copper resistance

Key Words: Heavy metal resistance, copper, life stage-specific, DSPR, QTL, MMP

Corresponding author:

Elizabeth Everman

Department of Molecular Biosciences

4043 Haworth Hall

1200 Sunnyside Avenue

University of Kansas

Lawrence, KS 66045

Tel: 785-864-5777

Email: [e.everman@ku.edu](mailto:e.everman@ku.edu)

## 1 **Abstract**

2           A range of heavy metals are required for normal cell function and homeostasis. Equally,  
3 the anthropogenic release of heavy metals into soil and water sources presents a pervasive  
4 health threat. Copper is one such metal; it functions as a critical enzymatic cofactor, but at high  
5 concentrations is toxic, and can lead to the production of reactive oxygen species. Using a  
6 combination of quantitative trait locus (QTL) mapping and RNA sequencing in the *Drosophila*  
7 Synthetic Population Resource (DSPR), we demonstrate that resistance to the toxic effects of  
8 ingested copper in *D. melanogaster* is genetically complex, and influenced by allelic and  
9 expression variation at multiple loci. Additionally, we find that copper resistance is impacted by  
10 variation in behavioral avoidance of copper and may be subject to life-stage specific regulation.  
11 Multiple genes with known copper-specific functions, as well as genes that are involved in the  
12 regulation of other heavy metals were identified as potential candidates to contribute to  
13 variation in adult copper resistance. We demonstrate that nine of 16 candidates tested by RNAi  
14 knockdown influence adult copper resistance, a number of which may have pleiotropic effects  
15 since they have previously been shown to impact the response to other metals. Our work  
16 provides new understanding of the genetic complexity of copper resistance, highlighting the  
17 diverse mechanisms through which copper pollution can negatively impact organisms.  
18 Additionally, we further support the similarities between copper metabolism and that of other  
19 essential and nonessential heavy metals.

20

## 21 **Introduction**

22 Anthropogenic release of heavy metals into soil and water sources presents a pervasive  
23 threat with long-lasting ecological, health, and economic impacts (Wu et al. 1975; Wuana and  
24 Okieimen 2011; Babin-Fenske and Anand 2011; Gall et al. 2015). Elevated heavy metals have  
25 been reported in dozens of organisms at all levels of the ecosystem (Neuberger et al. 1990;  
26 Georgieva et al. 2002; Sánchez-Chardi and Nadal 2007; Usmani 2011; Gall et al. 2015; Wright et  
27 al. 2015; Plessl et al. 2017; Ecke et al. 2017; Ilunga Kabeya et al. 2018), demonstrating that the  
28 toxic effects of heavy metal pollution are wide reaching, and can spread through food webs (Gall  
29 et al. 2015; Ilunga Kabeya et al. 2018). Although required for normal physiological function at low  
30 concentrations, copper is one of many common environmental heavy metal pollutants linked to  
31 mining (Ramirez et al. 2005; Wuana and Okieimen 2011; Wright et al. 2015), pipes used to  
32 provide drinking water (Harvey et al. 2016), and pesticide use (de Oliveira-Filho et al. 2004). In its  
33 essential role, copper helps bind oxygen, catalyzes enzymatic reactions, and promotes normal  
34 neurological development (Hart et al. 1928; Danks 1988; World Health Organization et al. 1996;  
35 Uriu-Adams and Keen 2005; Norgate et al. 2006; Navarro and Schneuwly 2017). However,  
36 excessive copper exposure ultimately leads to the accumulation of reactive oxygen species,  
37 which can cause cellular damage through oxidative stress (Uriu-Adams and Keen 2005;  
38 Tchounwou et al. 2008).

39 Evolutionarily conserved metal-responsive transcription factor 1 (MTF-1) and  
40 metallothionein (MT) proteins function as a first line of defense against toxic effects of excessive  
41 copper exposure in diverse organisms including humans, flies, fungi, and plants (Macnair 1993;  
42 Goldsbrough 2000; Bellion et al. 2007; Calap-Quintana et al. 2017). MTF-1 binds to metal  
43 responsive elements of MT genes, increasing MT abundance in copper accumulating cells and  
44 allowing excess heavy metal ions to be sequestered until they are removed from the system  
45 (Filshie et al. 1971; Stuart et al. 1985; Mokdad et al. 1987; Egli et al. 2003; Balamurugan et al.  
46 2004; Southon et al. 2004). Metal chaperone and transporter proteins such as *Ccs* (Culotta et al.  
47 1997), *Atox1* (Southon et al. 2004; Hatori and Lutsenko 2013), *ATP7* (Norgate et al. 2006), and  
48 *CTR1* family transporters (Petris et al. 2003; Guo et al. 2004; Balamurugan et al. 2007; Turski and  
49 Thiele 2007; Calap-Quintana et al. 2017; Navarro and Schneuwly 2017) play a crucial role in the

50 response to heavy metal toxicity as well (Egli et al. 2003; Petris et al. 2003; Yepiskoposyan et al.  
51 2006; Janssens et al. 2009). For example, in *Drosophila melanogaster*, high copper exposure  
52 decreases translation of *Ctr1A* and *Ctr1B* via *MTF-1* to reduce influx of copper ions (Balamurugan  
53 et al. 2007; Turski and Thiele 2007; Calap-Quintana et al. 2017; Navarro and Schneuwly 2017),  
54 whereas high copper exposure in humans leads to degradation of the *hCTR1* protein (the human  
55 ortholog of *Ctr1A/B*) and a reduction in the intracellular concentration of copper (Petris et al.  
56 2003; Guo et al. 2004).

57         Much of our understanding of the response to copper stress has come from studies that  
58 use genetic manipulation to define the roles of metal responsive genes (e.g. Egli et al. 2003,  
59 2006a; Bellion et al. 2007; Kirby et al. 2008; Bahadorani et al. 2010). However, QTL (quantitative  
60 trait locus) and GWA (genome-wide association) studies have demonstrated the genetic  
61 complexity of the response to heavy metal stress (Willems et al. 2007; Courbot et al. 2007; Zhou  
62 et al. 2017). For example, QTL mapping using *Caenorhabditis elegans* recombinant inbred  
63 advanced intercross lines (RIAILs) showed that several regions of the genome are involved in the  
64 response to cadmium, copper, and silver exposure (Evans et al. 2018). GWA with the *Drosophila*  
65 Genetic Reference Panel (DGRP) revealed multiple candidate loci associated with the response  
66 to cadmium and lead stress (Zhou et al. 2017). QTL mapping of metal resistance in plants has  
67 further demonstrated the role that allelic variation plays in the response to heavy metal stress  
68 despite strong selection pressure against metal-sensitive alleles in natural populations (Willems  
69 et al. 2007; Courbot et al. 2007; Turner et al. 2010; Arnold et al. 2016). For instance, an  
70 interspecific QTL study of two closely related species of *Arabidopsis* (metal-tolerant *A. halleri* x  
71 metal-sensitive *A. lyrata petraea*) identified multiple regions of the genome that contributed to  
72 zinc and cadmium resistance, and demonstrated that metal resistant alleles had become fixed in  
73 the metal tolerant species in the populations sampled (Willems et al. 2007; Courbot et al. 2007).  
74 Similarly, sequencing of *A. arenosa* populations locally adapted to serpentine soils revealed  
75 strong selection for introgressed alleles from the more tolerant *A. lyrata* (Arnold et al. 2016).  
76 These and other examples from *Mimulus guttatus* growing in old copper mine tailings (Allen  
77 1971; Macnair 1983; MacNair et al. 1993; Wright et al. 2015; Selby and Willis 2018) highlight the

78 utility of using a quantitative genomics approach with powerful mapping panels to examine the  
79 influence of allelic variation on metal tolerance.

80 *D. melanogaster* is an important model for understanding the mechanisms involved in the  
81 response to toxic heavy metal exposure due to the ease with which it can be genetically  
82 manipulated (e.g. Egli et al. 2006a; reviewed in Navarro and Schneuwly 2017) and to the  
83 extensive conservation of genes involved in the response to metal ions between flies and humans  
84 (Zhou et al. 2017). In addition, the existence of large *Drosophila* mapping panels makes this model  
85 system especially well-suited for examining the effect of naturally-occurring alleles on the  
86 response to heavy metal stress. In this study, we used the *Drosophila* Synthetic Population  
87 Resource (DSPR) (King et al. 2012a; b) to investigate the influence of allelic and expression  
88 variation on the response to toxic copper exposure through QTL mapping with more than 1500  
89 strains, and RNA sequencing of copper-resistant and copper-sensitive strains. Because several  
90 genes, including *MTF-1* and MTs, respond to multiple heavy metals (e.g. copper, zinc, lead, and  
91 cadmium (Calap-Quintana et al. 2017)), and because other's work has suggested that pleiotropic  
92 QTL can underlie genetic variation for multiple metals (Evans et al. 2018), our focus on the genetic  
93 architecture of copper resistance has the potential to provide insight into a broader set of genes  
94 with allelic and expression variation that influence the response to heavy metal stress.

95 In this study, we mapped 12 QTL associated with variation in adult female copper  
96 resistance, and the implicated genomic regions include genes with known copper-specific  
97 functions. Of particular note are *Ccs*, which shuttles copper ions to superoxide dismutase 1  
98 (SOD1) (Schmidt et al. 2000), *Sod3*, which binds extracellular copper ions and is involved in the  
99 response to oxidative stress (Blackney et al. 2014), and *CG11825*, a gene that has been previously  
100 linked to copper exposure in other studies (Norgate et al. 2007). Copper resistance QTLs include  
101 genes with functions linked to other metals, including *Catsup* (zinc, (Navarro and Schneuwly  
102 2017)) and *whd* (lead and cadmium (Strub et al. 2008)), providing new evidence that these genes  
103 may also be involved in the response to copper stress. Gene expression differences between a  
104 subset of resistant and sensitive DSPR strains additionally showed that many other genes are  
105 involved in the response to copper stress. We showed that copper sensitive strains were  
106 characterized by increased expression of genes related to mitochondrial function and energy

107 synthesis relative to resistant strains. We tested 16 candidate genes that were implicated by QTL  
108 or differential expression analysis using RNAi knockdown in the whole animal and in the anterior  
109 region of the midgut. Knockdown of 9 of these genes, including both QTL and RNAseq candidates,  
110 influenced copper resistance. Overall, because several of our candidates have not been  
111 previously linked to copper stress, we were able to demonstrate that both genes with known  
112 copper specific function (such as *Ccs*) and genes that may influence regulation of other heavy  
113 metals (such as *trpl*) influence resistance to copper stress. Together, our study provides new  
114 insight into the diverse set of genes that impact copper resistance through allelic and expression  
115 variation.

## 116 **Materials and Methods**

### 117 **Mapping panel**

118 We reared and phenotyped the >1500 recombinant inbred lines (RILs) that comprise the  
119 DSPR (*Drosophila* Synthetic Population Resource) to measure variation in susceptibility to copper  
120 stress. The DSPR is a multiparental, advanced generation intercross mapping panel derived from  
121 15 unique and fully-sequenced founder strains, which represent a global sampling of genetic  
122 diversity in *D. melanogaster*. The DSPR consists of two mapping panels (A and B), which are  
123 composed of two subpanels (A1 and A2, and B1 and B2). The subpanels were started from the  
124 same set of founders, but were maintained independently (see King et al. 2012b for additional  
125 details on the mapping panel).

### 126 **Rearing and assay conditions**

127 Strains from the DSPR were maintained, reared, and tested in the same incubator under  
128 a 12:12hr light:dark photoperiod at 25°C and 50% humidity. To obtain female flies for the adult  
129 copper response assay, RNA sequencing, and RNAi validation, adults were transferred to  
130 cornmeal-molasses-yeast food, allowed to oviposit for two days, then discarded. Experimental  
131 female, presumably mated, flies from the following generation were sorted over CO<sub>2</sub> and were  
132 placed into vials with new cornmeal-molasses-yeast media for 24 hours prior to the start of each  
133 assay before they were transferred to copper-supplemented food. All adult assays were  
134 performed on 3-5 day old individuals.

### 135 **Adult female copper resistance**

136 The adult female response to copper stress was measured as percent survival on media  
137 containing 50mM CuSO<sub>4</sub> following a 48-hour exposure period. As essentially no flies die on  
138 control food throughout the span of our assay (Highfill et al. 2016), we did not assess adult female  
139 survival on control food in this study. Experimental females were transferred without CO<sub>2</sub>  
140 anesthesia to vials containing 1.8g potato-based Instant *Drosophila* Medium (Carolina Biological  
141 Supply Company 173200) hydrated with 8mL 50mM CuSO<sub>4</sub> (Copper(II) sulfate, Sigma-Aldrich  
142 C1297). Instant *Drosophila* Medium is estimated to contain approximately 0.02mM Cu prior to  
143 hydration (Maroni and Watson 1985). Copper resistance was measured in a total of 11 batches  
144 across the A (N strains = 767) and B (N strains = 789) mapping panels of the DSPR. Each strain was  
145 measured in a single batch with 3 vial replicates each containing between 7 and 20 individuals  
146 (average number of flies per vial replicate = 19.4). The effect of copper on survival was reported  
147 as mean percent survival per strain across the three replicate vials. Retaining vials with fewer  
148 than 15 flies did not impact our QTL mapping results in a meaningful way (see below). Hereafter,  
149 the adult survival response to 48hr 50mM CuSO<sub>4</sub> is referred to as adult copper resistance.

### 150 **Adult female feeding response to copper-supplemented media**

151 A subset of strains evenly sampled throughout the distribution of B2 subpanel adult  
152 copper resistance ( $0\% \pm 0$  S.E. –  $98.4\% \pm 1.59$  S.E.) were used to measure the effect of copper  
153 exposure on food intake. We measured food intake in 3 blocks with at least two vial replicates of  
154 20 females per strain (N = 95) per treatment (control vs. copper), following a protocol modified  
155 from (Shell et al. 2018).

156 Briefly, we added 1% Erioglaurine Disodium Salt (Sigma-Aldrich 861146), a blue dye, to  
157 water and to 50mM CuSO<sub>4</sub> no more than 24 hours prior to the assay to avoid dye decomposition.  
158 We hydrated 0.9g Instant *Drosophila* Medium with 4mL liquid, and flies were allowed to consume  
159 dyed food for 24 hours before they were frozen for up to 5 hours. No flies died during the 24-  
160 hour period. Subsequently, flies were homogenized with 3-4 glass beads in 600μL distilled water  
161 for 45 seconds using a Mini-Beadbeater-96 (BioSpec Products). Homogenate was centrifuged for  
162 5 minutes at 14,000rpm, and 200μL supernatant was transferred to a 96-well plate. Fly  
163 homogenate was frozen for up to 48 hours before absorbance at 630nm was measured with a

164 BioTek Multimode Microplate reader (Synergy 2 v.1.03). Two water blanks and 14 standards  
165 ranging from  $6.25 \times 10^{-5}\%$  to 0.006% dye in water were prepared fresh for each block, and were  
166 included in each plate to determine the dye concentration of fly homogenate, and to assess  
167 consistency among blocks. Absorbance readings for standards were highly correlated across  
168 plates and blocks (Table S1). To calculate the estimated amount of dye consumed, we used a  
169 linear model to find the slope and intercept of the standard curve (Concentration of Standard  $\sim$   
170 Absorbance \* Block). Estimated percent dye in each fly homogenate sample was determined with  
171 the equation

172

173

$$174 \quad \% \text{ Dye in Sample} = (0.002443 \times \text{absorbance}) - 0.0001465$$

175

176

177 Variation in feeding behavior among DSPR strains on copper and control food was  
178 assessed with a two-way ANOVA with an interaction (% Dye Consumed  $\sim$  DSPR Strain \*  
179 Treatment), and effect size was calculated using Cohen's F (R package sjstats) (Cohen 1988;  
180 Lüdecke 2018). The correlation between average percent dye consumed and average adult  
181 copper resistance was assessed with a linear model that included an interaction between percent  
182 dye consumed and treatment in addition to the additive effects of these factors.

### 183 **Copper-specific developmental response**

184 Developmental viability was estimated in the B panel from 100 strains that were evenly  
185 sampled from throughout the distribution of B1 and B2 subpanel adult copper resistance ( $0\% \pm$   
186  $0$  S.E. –  $98.4\% \pm 1.59$  S.E.). Approximately 100 females per strain were allowed to oviposit on  
187 cornmeal-molasses-yeast media for 17-20 hours in 6oz polypropylene *Drosophila* bottles  
188 (Genesee Scientific: 32-130) with yeast paste to encourage egg laying. Following oviposition,  
189 remaining yeast paste was removed and embryos were gently dislodged from the media surface  
190 by rinsing with 1X PBS and swirling with a small, bristled paintbrush. Subsequently, for each  
191 strain, we arrayed multiple aliquots of 10 $\mu$ L of embryos suspended in 1X PBS onto a petri dish  
192 containing 2% agar dyed blue with Erioglaucine Disodium Salt (Sigma-Aldrich 861146; 8mg/mL).



193 For each dish we aliquoted eggs into 14 cells (Figure S1), photographed the dish (Nikon D3200,  
194 105mm 1:2.8 DG Sigma Macro lens), and the number of embryos within each cell was recorded  
195 with ImageJ (v. 1.51s). Embryos from each cell (30 – 306 embryos, average = 125 embryos) were  
196 then transferred with a rubber, bristleless paintbrush to vials containing control or 2mM CuSO<sub>4</sub>  
197 hydrated Instant *Drosophila* Medium (1.8g media plus 8ml liquid). The rubber paintbrush was  
198 examined after each egg transfer to ensure all eggs had been transferred to the vial. The  
199 developmental response to copper was assessed with 4-7 replicates per treatment for each strain  
200 (mean replicates per strain = 6.8). We used a lower copper concentration in this assay because  
201 previous reports have shown that the larval life stage is much more susceptible to copper toxicity  
202 compared to adults (Bahadorani and Hilliker 2009).

203 Copper stress has the potential to reduce the number of individuals that complete  
204 development from egg to adult as well as the time needed for individuals to complete  
205 development. To estimate the effect of copper exposure on development time, for each  
206 experimental vial we recorded the number of days between set up and the first emergence of  
207 adults. To assess the effect of copper on developmental viability, we calculated the proportion  
208 of embryos in each vial that eclosed as adults in the seven days following the day of first  
209 emergence. Developmental viability was square root transformed to improve deviation from  
210 normality within treatment (Shapiro Wilks Test on transformed data;  $W = 0.99$ ,  $P = 0.04$ ). From  
211 here forward, square root transformed developmental viability is simply referred to as  
212 developmental viability and all subsequent analyses were performed on square root transformed  
213 data. Vials were monitored daily for 30 days after set up. Of the 1,356 vials included in this assay,  
214 100 copper treatment vials yielded zero flies. These vials were given a development time of 30  
215 days.

216 We used a 2-way ANOVA with an interaction to measure the effect of strain and  
217 treatment on each developmental response. The DSPR strains we used in this study varied in  
218 development time ( $F_{99,579} = 11.8$ ,  $P < 0.00001$ ; Table S2A) and developmental viability on control  
219 food ( $F_{99,579} = 31.6$ ,  $P < 0.00001$ ; Table S2B). Furthermore, regression analysis demonstrated that  
220 development time and developmental viability in control and copper conditions were correlated  
221 (development time:  $F_{(1,98)} = 61.0$ ,  $P < 0.0001$ ,  $R^2 = 38\%$ ; Table S2C, Figure S2A; developmental

222 Viability:  $F_{(1,98)} = 54.1$ ,  $P < 0.0001$ ,  $R^2 = 36\%$ ; Table S2D, Figure S2B). Therefore, we regressed out  
223 variation in control development time and control developmental viability with linear models to  
224 more directly assess the effect of copper stress on these metrics of development. Residual  
225 development time and residual developmental viability are referred to from hereafter as copper-  
226 specific development time and copper-specific developmental viability, respectively.

## 227 **Heritability**

228 We estimated the genetic and phenotypic variances of adult copper resistance, control  
229 and copper feeding responses, copper-specific development time, and copper-specific  
230 developmental viability using linear mixed models (lme and varcomp functions in R; (R package:  
231 APE Paradis et al. 2004; R package: nlme Pinheiro et al. 2017)). For all responses, panel-specific  
232 broad-sense heritabilities were calculated as the proportion of the total strain-specific variation  
233 in the response to copper explained by the estimated genetic variance component (Lynch and  
234 Walsh 1998).

## 235 **QTL mapping of life stage-specific response to copper stress**

236 We used the DSPRqtl package in R ([github.com/egking/DSPRqtl](https://github.com/egking/DSPRqtl); [FlyRILs.org](https://flyrils.org)), to identify  
237 QTL associated with variation in adult copper resistance, adult feeding response on control and  
238 on copper-supplemented food, copper-specific development time, and copper-specific  
239 developmental viability. QTL mapping was performed for each mapping panel (A and B) and  
240 phenotype separately. At each position in the genome, for each strain, we can estimate the  
241 additive probability that the segment of the genome was inherited from each of the 8 DSPR  
242 founders. QTL were identified by regressing the strain mean phenotype on these probabilities,  
243 and significance thresholds were assigned following 1000 permutations of the data (King et al.  
244 2012a; b). For adult copper resistance, peak positions for each QTL were estimated with 2-LOD  
245 support intervals (King et al. 2012a). Because fewer strains were used to measure the feeding  
246 and copper-specific development traits, we used a 3-LOD drop to determine peak support  
247 intervals for these traits (King et al. 2012a). Gene ontology (GO) analysis was performed without  
248 normalizing for gene length for genes included in peak intervals for each trait and mapping panel  
249 separately ([FlyMine.org](https://flymine.org) (Lyne et al. 2007)).

250 Adult copper resistance varied between the A1 and A2 subpanels but did not vary  
251 between the B subpanels (A panel:  $F_{1,2289} = 12.64$ ;  $p < 0.001$ ; B panel:  $F_{1,2495} = 0.03$ ;  $p = 0.86$ ;  
252 Figure S3; Table S2E,F). Therefore, subpanel was included as a model covariate only in the QTL  
253 analysis of panel A. Phenotyping batch also significantly influenced variation in adult copper  
254 resistance in both the A and B panels (Table S2E,F). However, including batch as a covariate in  
255 the QTL mapping model did not drastically alter the estimation of LOD scores for either panel (A  
256 panel correlation between LOD scores = 99%; B panel correlation = 98%; Figure S4A), so we only  
257 present data from the models lacking batch as a covariate. Because the development assay was  
258 conducted on 100 strains across 15 batches, DSPR strain was highly confounded with batch.  
259 Therefore, we did not include batch or subpopulation as a covariate in the QTL mapping models  
260 for copper-specific development time or copper-specific developmental viability. As each strain  
261 assessed in the feeding response assay was measured in each of three blocks, block was not  
262 included in the model for either average feeding response on control or copper food.

263 To determine whether including vials containing relatively few flies influenced QTL  
264 mapping results due to mis-estimated phenotype means, we additionally mapped variation in  
265 adult copper resistance using only data from vials containing at least 15 flies (removing 316 - 7%  
266 - of the vials). LOD scores for the full data set were highly correlated with those for the reduced  
267 dataset for each panel (A panel correlation = 99%; B panel correlation = 99%; Figure S4B), so we  
268 only present data from analyses using all vials.

### 269 **Differential gene expression in high and low adult copper resistance strains**

270 We examined gene expression variation in a subset of 10 strains (6 with high adult  
271 resistance: 76 – 98% survival, and 4 with low adult resistance: 0.0 – 18% survival) from the B  
272 panel to explore how adult copper resistance class and gene expression interact when individuals  
273 are exposed to 50mM  $\text{CuSO}_4$ . Twenty experimental females from each DSPR strain were  
274 transferred to Instant *Drosophila* Medium hydrated with either water as a control or 50mM  
275  $\text{CuSO}_4$  for 9 hours. No individuals died during the 9-hour exposure period. Following exposure,  
276 10 females from each strain and treatment were flash frozen in liquid nitrogen, placed in TRIzol  
277 Reagent (Invitrogen, 15596018), and immediately stored at  $-80^\circ\text{C}$ . RNA was extracted from each  
278 of the 20 samples with the Direct-zol RNA Miniprep kit (Zymo Research, R2050), eluted in 100 $\mu\text{L}$

279 water and stored at  $-80^{\circ}\text{C}$ . We prepared libraries with the TruSeq Stranded mRNA kit (Illumina,  
280 20020595), and paired-end 37-bp mRNA libraries were each sequenced to  $\sim 20$  million reads on  
281 an Illumina NextSeq 550 at the University of Kansas Genome Sequencing Core.

282 Sequence quality assessment and trimming were performed using fastp (Chen et al.  
283 2018). We used kallisto to perform pseudoalignment-based mapping of reads (Ensembl  
284 transcriptome release 90) (Bray et al. 2016), and performed differential expression analysis with  
285 sleuth (v.0.30.0) using likelihood ratio tests (Pimentel et al. 2017). Gene expression is likely to  
286 vary between the different DSPR strains; however, we were primarily interested in understanding  
287 whether there are consistent differences in gene expression between high and low resistance  
288 classes of strains. Given this interest, we treated each strain as a biological replicate of the high  
289 and low resistance classes and did not include DSPR strain in differential expression models. After  
290 determining that the interaction between resistance class and treatment did not influence  
291 expression of any gene at a 5% FDR (False Discovery Rate), we tested the additive effects of  
292 resistance class and treatment on gene expression, referred to from here as the full model (full  
293 model:  $\sim \text{TRT} + \text{RES}$  vs reduced model:  $\sim 1$ ). We also examined the influence of each term  
294 independently in two additional models. The effect of treatment alone was assessed by  
295 accounting for resistance class (treatment model:  $\sim \text{TRT} + \text{RES}$  vs. reduced model:  $\sim \text{RES}$ ), and the  
296 effect of resistance class alone was assessed by accounting for treatment (resistance model:  $\sim$   
297  $\text{TRT} + \text{RES}$  vs. reduced model:  $\sim \text{TRT}$ ). From here on, these term-specific models are referred to  
298 as the treatment model and the resistance model, respectively. Significantly differentially  
299 expressed (DE) genes for each model were identified with a 5% FDR threshold.

300 We generated three lists of significantly differentially expressed (DE) genes: full model DE  
301 genes, treatment model DE genes, and resistance model DE genes. Sleuth applies a filter against  
302 genes with low expression (Pimentel et al. 2017). We applied an additional filter following sleuth  
303 analysis to remove genes from DE gene lists with average expression of less than 1 TPM  
304 (Transcripts Per Million). Additionally, we eliminated genes with expression variance greater than  
305 or equal to 1 TPM in any of the following four categories: sensitive strains, control treatment;  
306 sensitive strains, copper treatment; resistant strains, control treatment; resistant strains, copper  
307 treatment (Figure S5). We used principal components analysis (PCA) to examine the effect of

308 treatment and resistance class using quantile normalized TPM data for DE genes. DE gene lists  
309 were examined for co-regulated clusters of genes using Clust (Abu-Jamous and Kelly 2018). Gene  
310 ontology (GO) analysis was performed for each cluster and for each of the DE gene lists in their  
311 entirety (FlyMine.org (Lyne et al. 2007)).

### 312 **RNAi knockdown of candidate genes associated with adult copper resistance**

313 QTL mapping and RNAseq of adult females provided several candidate genes that were  
314 implicated by one or both of these experiments. TRiP UAS-RNAi strains (Perkins et al. 2015) for  
315 candidate genes, as well as a control UAS-LUC.VALIUM10 strain, were obtained from the  
316 Bloomington Drosophila Stock Center (BDSC) (Table S3). Crosses involved 10 TRiP males and 10  
317 virgin females from Gal4-expressing driver strains. Each TRiP strain was crossed to both a  
318 ubiquitous Gal4-expressing driver strain (BDSC 25374) and an anterior midgut specific Gal4-  
319 expressing RNAi driver strain (1099 from Nicholas Buchon, flygut.epfl.ch). Three candidate gene  
320 TRiP strains (*swm*, *Catsup*, and *CG11825*) produced too few flies to test when crossed to the  
321 ubiquitous Gal4-expressing driver, and were thus excluded from our analysis. We tested two TRiP  
322 UAS RNAi strains for the genes *CG5235*, *MtnC*, and *ZnT41F* to assess the consistency in the effect  
323 of gene knockdown on copper survival (Table S3). An average of 19.3 Gal4-UAS RNAi females  
324 (min 7) were transferred to Instant Drosophila Medium hydrated with 50mM CuSO<sub>4</sub> using an  
325 average of 16.8 (min 10) replicate vials per genotype (a total of 203-365 individuals per genotype)  
326 across four batches. We counted flies daily until all were dead, and the response to copper stress  
327 in these RNAi knockdown genotypes was quantified as average lifespan. We chose to measure  
328 lifespan on copper instead of percent survival at 48 hours (as in our DSPR screen) because we  
329 had no meaningful a priori expectation that survival would be variable at 48 hours among the  
330 RNAi genotypes, and knockdown in genes hypothesized to influence the response to copper  
331 toxicity could drastically reduce or extend survival. To establish that GAL4-UAS-RNAi genotypes  
332 were not inherently unhealthy, we additionally placed 20 such females from each cross on Instant  
333 *Drosophila* Medium hydrated with water to assess overall viability. No individuals died on copper-  
334 free media through the duration of the RNAi assay. We compared copper resistance for each  
335 RNAi knockdown to its respective control using per vial average lifespan controlling for batch

336 with a two-way ANOVA (Average Lifespan ~ Strain \* Batch) with planned comparisons. These  
337 analyses were performed separately for each GAL4 driver.

### 338 Data availability

339 All raw data and images generated from this study including adult and developmental  
340 copper resistance traits, feeding data, raw QTL mapping data, normalized TPM expression data,  
341 and RNAi data are available at FigShare. File S1 contains descriptions for all accompanying data  
342 files. DSPR genotype information is publicly available at <http://wfitc.bio.uci.edu/~dspr/>. RNAseq  
343 reads will be submitted to the NCBI SRA prior to acceptance. Unless otherwise stated, all analyses  
344 were performed in R (v. 3.6.2) (R Core Team 2017).

## 345 Results

### 346 Abundant variation in adult female copper resistance

347 We measured adult copper resistance in females from over 1,500 DSPR RILs by exposing  
348 close to 60 flies (3 vials of 20 flies) from each strain to 50mM CuSO<sub>4</sub> for 48 hours. Phenotypic  
349 variation and heritability were high for female copper resistance in both the A and B panels of  
350 the DSPR (A panel: H<sup>2</sup> = 83.0%; B panel: H<sup>2</sup> = 78.8%; Figure 1).

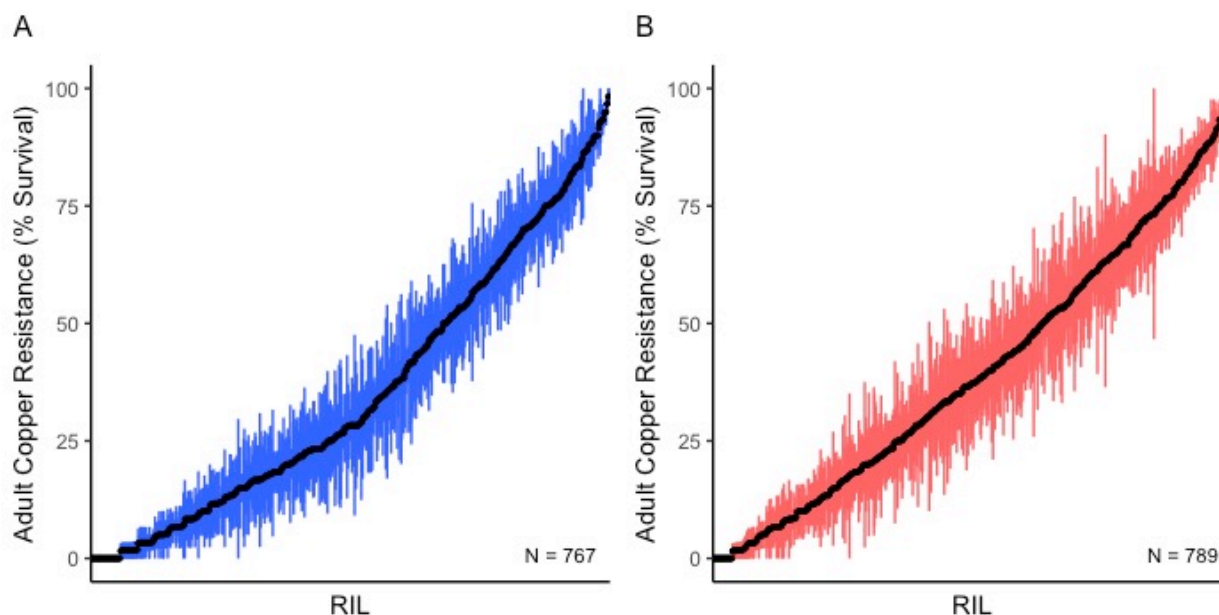

351  
352 **Figure 1.** Variation in mean female adult copper resistance ( $\pm$  SE) per DSPR strain in the A (A) and B (B)  
353 panels following 48-hour exposure to 50mM CuSO<sub>4</sub>. Recombinant inbred line (RIL) is ordered by magnitude  
354 of response along the x axis.

355  
356  
357  
358  
359  
360  
361  
362  
363  
364  
365  
366  
367  
368  
369  
370  
371  
372

### **Adult female feeding response to copper-supplemented media**

Since the toxicity of copper in our assay likely stems from ingestion, we were interested in flies' feeding response to copper-supplemented media. Using a sample of 95 strains from the B2 subpanel that spanned the distribution of adult copper resistance (from 0% - 98.4% survival), we tested the effect of 50mM CuSO<sub>4</sub> on feeding behavior. We estimated feeding by measuring the amount of dye consumed by flies exposed to food hydrated with water or a copper solution within a 24-hour period. Both DSPR strain and treatment significantly influenced feeding (DSPR Strain:  $F_{94,384} = 3.08$ ,  $P < 0.00001$ ; Treatment:  $F_{1,384} = 2306$ ,  $P < 0.00001$ , Table S2G; Figure 2A), although treatment had a much larger effect on the feeding response than strain (Cohen's F: Treatment = 2.57, DSPR strain = 0.91). We also observed an interaction between strain and treatment (DSPR Strain x Treatment:  $F_{94,384} = 2.77$ ,  $P < 0.00001$ , Cohen's F = 0.86, Table S2G), indicating that the reduction in feeding due to copper is not uniform across strains (Figure 2). Both feeding responses had high heritability (control feeding response:  $H^2 = 87.6\%$ ; copper feeding response:  $H^2 = 87.6\%$ ).

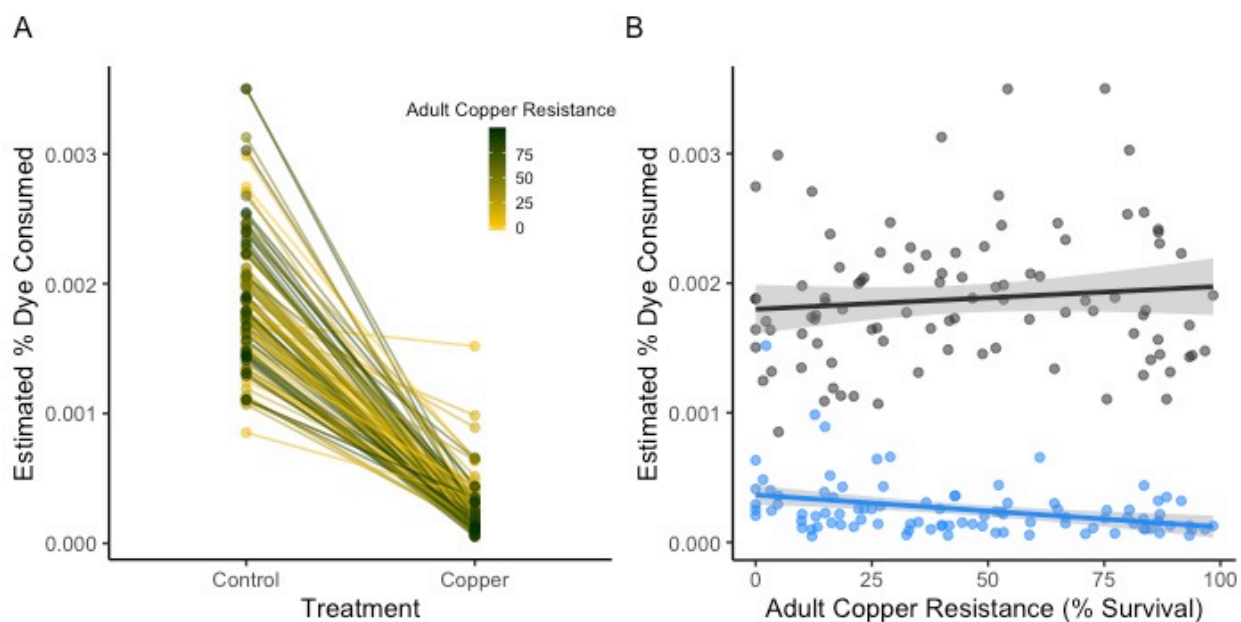

373  
374 **Figure 2.** Feeding behavior in 95 DSPR strains changed in response to 24-hour exposure to 50mM CuSO<sub>4</sub>.  
375 A. Mean percent dye consumed varied among DSPR strains ( $P < 0.00001$ ) and was much lower under  
376 copper conditions relative to control (water) conditions (Treatment:  $P < 0.00001$ ). The interaction between  
377 strain and treatment ( $P < 0.00001$ ) suggests that sensitivity to copper varies among the strains. B. Feeding  
378 behavior under control conditions was not correlated with adult copper resistance ( $P = 0.32$ ); feeding  
379 behavior on copper was correlated with adult copper resistance (Adult Copper Resistance x Treatment:  $P$   
380  $= 0.03$ ). Feeding response to copper is shown in blue; the control response is shown in black. Shading  
381 indicates the 95% CI of the regression.

382

383

384

385 Overall, feeding behavior under copper conditions was weakly negatively correlated with  
386 adult copper resistance ( $R = -34.6\%$ ,  $F_{3,186} = 263.7$ ,  $P = 0.03$ ; Table S2H, Figure 2B), while feeding  
387 behavior under control conditions was not correlated with adult copper resistance ( $R = 10.2\%$ ,  
388  $F_{1,93} = 0.98$ ,  $P = 0.32$ , Figure 2B). This suggests that our adult copper resistance phenotype is  
389 partially influenced by a copper-specific behavior, where more sensitive strains tend to eat more  
390 copper food than more resistant strains in a 24-hour period. Equally, the limited strength of the  
391 relationship likely implies our resistance phenotype is primarily impacted by the physiological  
392 and metabolic response to copper and is not solely influenced by behavioral avoidance.



### 393 Copper-specific developmental response

394 In organisms with complex life cycles, the genetic control of physiological traits can be  
395 decoupled between life stages (Freda et al. 2017; Collet and Fellous 2019). To assess whether the  
396 strains with high resistance to copper as adults were also more resistant in other life stages, we  
397 sampled 100 strains from the B1 and B2 subpanels that span the range of adult copper resistance  
398 (from 0% – 98.4% survival). Embryos from these strains were placed on either control media, or  
399 media containing 2mM CuSO<sub>4</sub>, and the day of first adult emergence (development time) and the  
400 proportion of embryos that emerged as adults (developmental viability) was recorded. Both  
401 development time and developmental viability were variable among strains on copper and  
402 control media (development time:  $F_{99,1157} = 24.21$ ,  $P < 0.00001$ ; developmental viability:  $F_{99,1157} =$   
403  $49.17.21$ ,  $P < 0.00001$ ; Table S2I,J, Figure 3). Exposure to copper delayed emergence by nearly 4  
404 days on average ( $F_{1,1157} = 1293$ ,  $P < 0.00001$ ; Table S2I, Figure 3A) and significantly reduced  
405 developmental viability ( $F_{1,1157} = 3905$ ,  $P < 0.00001$ ; Table S2J, Figure 3B). There was an  
406 interaction between strain and treatment for both measures of the developmental response to  
407 copper, indicating that although development time and developmental viability were negatively  
408 affected by copper exposure for the majority of strains, the magnitude of the effect of treatment  
409 varied among strains (development time:  $F_{1,1157} = 11.75$ ,  $P < 0.00001$ ; developmental viability:  
410  $F_{1,1157} = 13.13$ ,  $P < 0.00001$ ; Table S2I,J, Figure 3A,B)

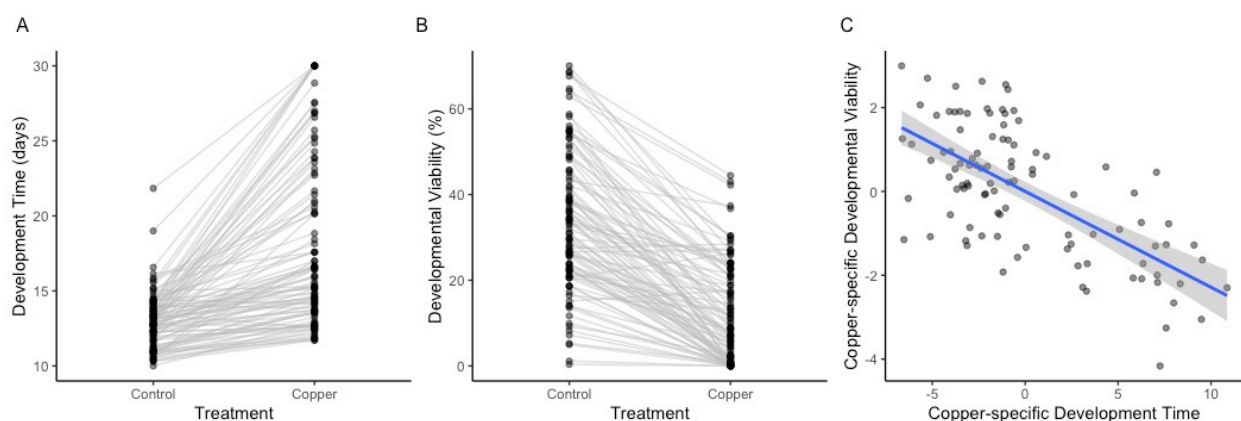

411 **Figure 3.** Development time (A) and developmental viability (B) were reduced in most strains by exposure  
412 to 2mM CuSO<sub>4</sub>. C. Copper-specific developmental viability and development time (corrected for strain-  
413 specific variation in these responses on control food) were correlated ( $P < 0.00001$ ,  $R^2 = 44\%$ ), indicating  
414 that strains with longer development time on copper-supplemented media also had lower viability. Points  
415 indicate the strain mean under each treatment condition. Grey shading indicates the 95% CI of the  
416 regression.  
417

418

419

420

421           Because we were primarily interested in the effects of copper on development time and  
422 developmental viability, we regressed out variation under control conditions from both  
423 developmental phenotypes (see Materials and Methods). Copper-specific development time and  
424 copper-specific developmental viability were correlated ( $F_{1,98} = 76.4$ ,  $P < 0.00001$ ,  $R^2 = 44\%$ ; Table  
425 S2K, Figure 3C), demonstrating that strains with longer development time on copper also had  
426 lower viability. Heritability was similar between copper-specific development time ( $H^2 = 87.7\%$ )  
427 and copper-specific developmental viability ( $H^2 = 87.7\%$ ).

428           Neither copper-specific development time nor copper-specific developmental viability  
429 were correlated with adult copper resistance at an alpha level of 0.05 (copper-specific  
430 development time:  $F_{1,98} = 0.16$ ,  $P = 0.69$ ,  $R^2 = 0.02$ ; Table S2L, Figure 4A; copper-specific  
431 developmental viability:  $F_{1,98} = 2.71$ ,  $P = 0.10$ ,  $R^2 = 2.7\%$ , Table S2M, Figure 4B). The lack of a  
432 significant correlation between both measures of the developmental copper response and adult  
433 copper resistance could imply that copper resistance is influenced by life stage-specific  
434 mechanisms. However, because several other aspects of our assays used to measure the adult  
435 and developmental response to copper differ (e.g. copper concentration and exposure time), the  
436 lack of a significant correlation between these life stage specific measures of the response to  
437 copper stress is likely also influenced by technical variation.

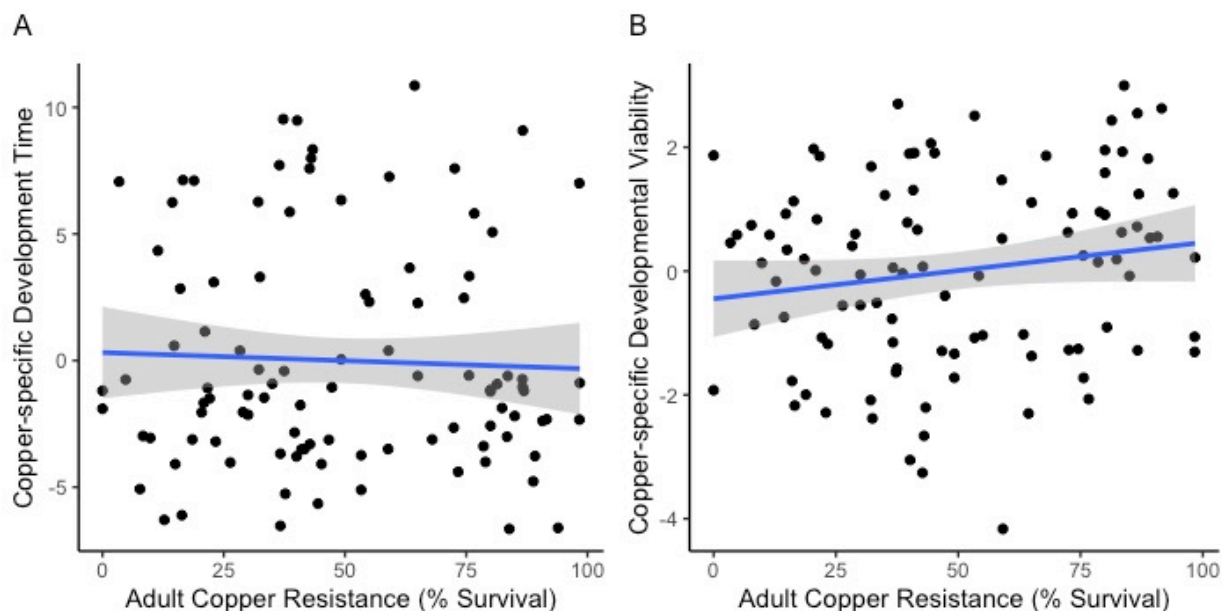

438  
439 **Figure 4.** Copper resistance is not correlated across life stages. A. Copper-specific development time was  
440 not correlated with adult copper resistance ( $P = 0.69$ ). B. Copper-specific developmental viability and adult  
441 copper resistance were not correlated ( $P = 0.10$ ). In both plots, points indicate strain means. Higher,  
442 positive values for copper-specific development time and developmental viability indicate longer or higher  
443 development time or viability on copper, respectively. Grey shading indicates the 95% CI of the regression  
444 between residual developmental response (corrected for variation in the response on control food) and  
445 adult female survival after 48hrs on 50mM  $\text{CuSO}_4$ .

446

447

448

#### 449 **QTL mapping of life stage-specific response to copper stress**

450 A principal goal of our study was to genetically dissect the response to copper stress, and  
451 using the DSPR we identified a total of 12 QTL between the A and B panels that were associated  
452 with variation in the adult copper resistance (Figure 5A, Table 1, Figure S6). Assuming that each  
453 QTL contributes to phenotypic variation in an additive manner, the QTL explained a substantial  
454 amount of variation in adult copper resistance (A panel: 36.19%; B panel: 27.93%; Table 1). The  
455 genetic architecture of adult copper resistance was largely panel-specific, with only one QTL (Q3)  
456 overlapping between the mapping panels. The 2-LOD drop interval of Q3 in the A panel fell  
457 entirely within the 2-LOD drop interval of Q3 in the B panel (Table 1, Figure 5A). Panel-specific  
458 genetic architecture of trait variation is consistent with several other studies that have mapped  
459 traits in both panels of the DSPR (Marriage et al. 2014; Najarro et al. 2017; Everman et al. 2019).

460 This lack of QTL peak overlap is likely the result of using a different set of founders to establish  
461 each mapping panel (King and Long 2017) but may also reflect a lack of power (King et al. 2012a)  
462 or epistatic effects that influence our ability to detect all QTL underlying adult copper resistance  
463 in each panel.

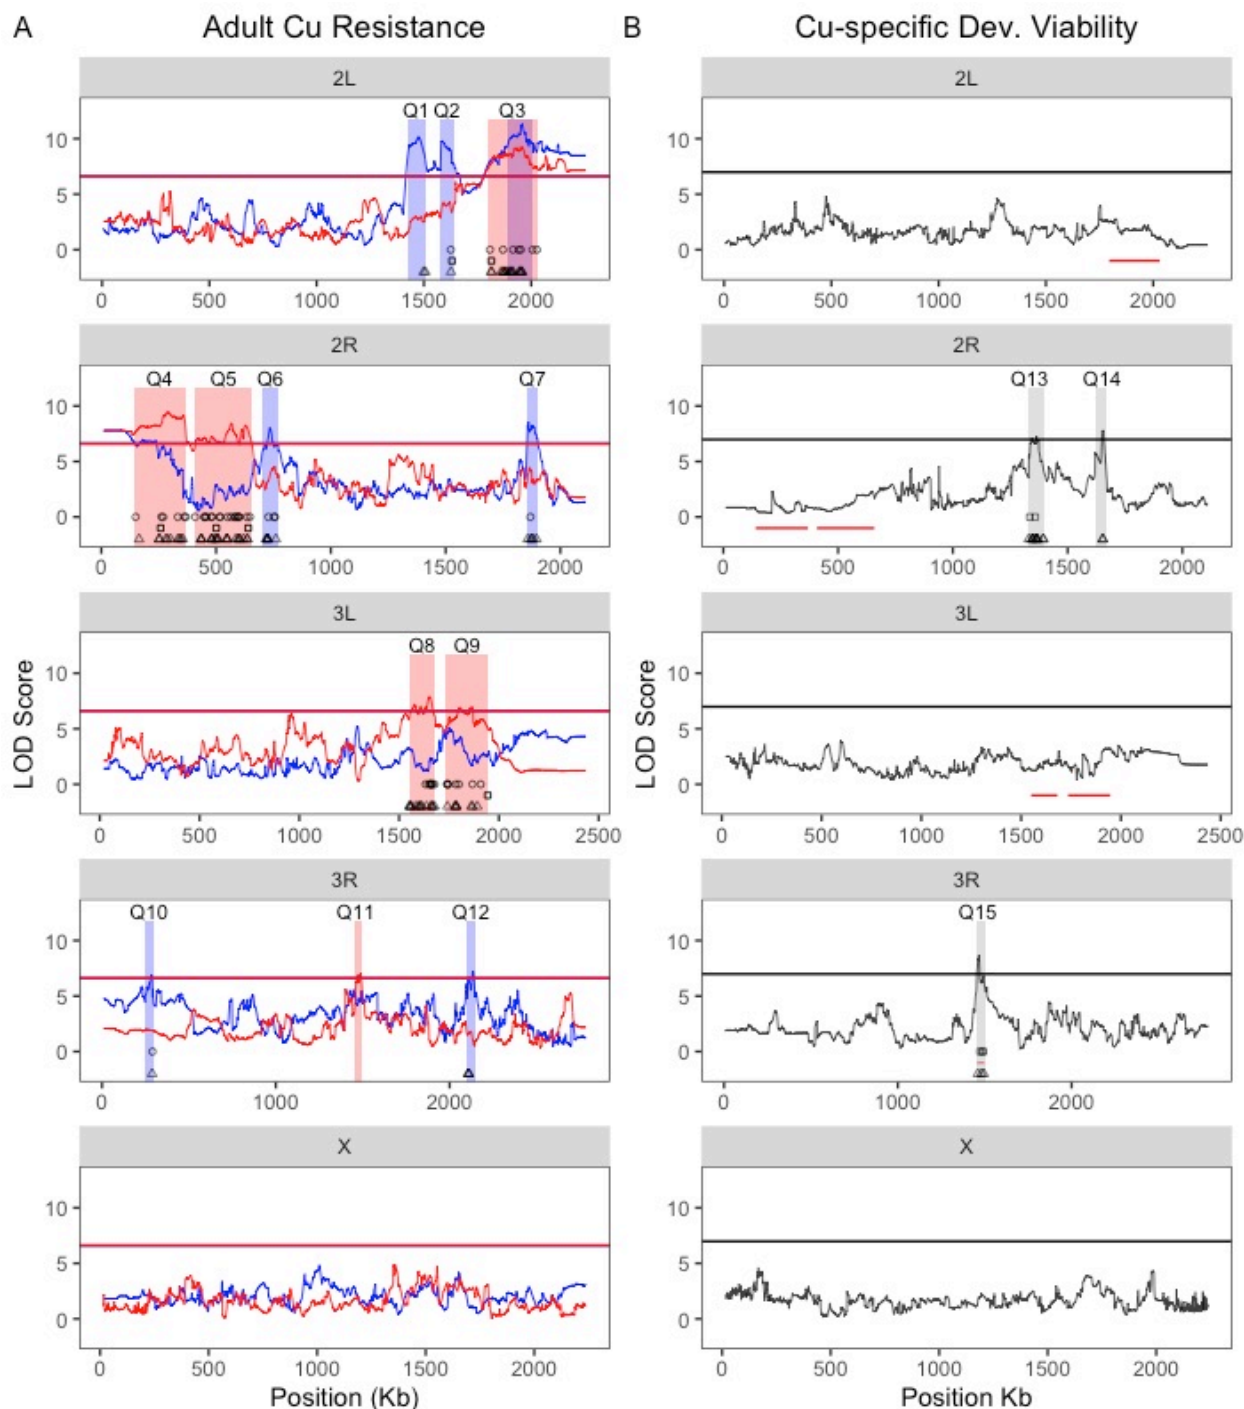

464 **Figure 5.** QTL associated with variation in adult copper resistance (A) and copper-specific developmental  
465 viability (B). A. We detected several QTL in the A (blue) and B (red) DSPR panels. Most QTL were panel  
466

467 *specific with one QTL (Q3) overlapping between panels. Red and blue bars represent the 2-LOD drop*  
468 *intervals for each QTL. B. QTL mapped for copper-specific developmental viability. One QTL (Q15) for*  
469 *developmental viability overlapped with Q11 contributing to adult copper resistance. Red horizontal lines*  
470 *represent the 2-LOD drop intervals for the 6 QTL associated with the B panel adult survival response to*  
471 *copper, and grey bars represent the 3-LOD drop for the three QTL associated with copper-specific*  
472 *developmental viability (Table 1). The horizontal lines in each plot represent permutation-derived 5%*  
473 *critical thresholds (the thresholds for each panel in A. are nearly identical, leading to the lines overlapping.)*  
474 *Round points indicate DE genes influenced by resistance class, triangle points indicate DE genes influenced*  
475 *by treatment, and square points indicated DE genes that are shared between the treatment and resistance*  
476 *class models.*

477

478

479

480 **Table 1. Summary of QTL identified for response to copper stress by panel and life stage.**

| <b>Adult Copper Resistance QTL: A panel</b> |                 |            |                                           |                              |                           |                              |
|---------------------------------------------|-----------------|------------|-------------------------------------------|------------------------------|---------------------------|------------------------------|
| <b>QTL</b>                                  | <b>Peak LOD</b> | <b>Chr</b> | <b>Physical Interval (Mb)<sup>a</sup></b> | <b>Genetic Interval (cM)</b> | <b>Variance Explained</b> | <b>No. Genes<sup>b</sup></b> |
| Q1                                          | 10.13           | 2L         | 14.22-15.07                               | 49.52-60.62                  | 5.91                      | 73                           |
| Q2                                          | 9.76            | 2L         | 15.77-16.38                               | 51.35-51.88                  | 5.70                      | 68                           |
| Q3A                                         | 11.3            | 2L         | 18.87-20.09                               | 53.39-53.85                  | 6.56                      | 154                          |
| Q6                                          | 8.01            | 2R         | 7.03-7.72                                 | 63.56-64.89                  | 4.70                      | 108                          |
| Q7                                          | 8.54            | 2R         | 18.54-19.03                               | 100.24-102.17                | 5.01                      | 92                           |
| Q10                                         | 6.88            | 3R         | 2.48-2.95                                 | 47.56-47.74                  | 4.05                      | 40                           |
| Q12                                         | 7.24            | 3R         | 21.01-21.46                               | 86.55-88.14                  | 4.26                      | 78                           |

  

| <b>Adult Copper Resistance QTL: B panel</b> |                 |            |                                           |                              |                           |                              |
|---------------------------------------------|-----------------|------------|-------------------------------------------|------------------------------|---------------------------|------------------------------|
| <b>QTL</b>                                  | <b>Peak LOD</b> | <b>Chr</b> | <b>Physical Interval (Mb)<sup>a</sup></b> | <b>Genetic Interval (cM)</b> | <b>Variance Explained</b> | <b>No. Genes<sup>b</sup></b> |
| Q3B                                         | 9.21            | 2L         | 17.95-20.31                               | 52.92-53.90                  | 5.24                      | 259                          |
| Q4                                          | 9.44            | 2R         | 1.41-3.69                                 | 54.99-57.07                  | 5.36                      | 247                          |
| Q5                                          | 8.46            | 2R         | 4.08-6.58                                 | 57.77-62.69                  | 4.82                      | 353                          |
| Q8                                          | 7.88            | 3L         | 15.50-16.82                               | 42.90-44.06                  | 4.49                      | 240                          |
| Q9                                          | 6.97            | 3L         | 17.35-19.47                               | 44.48-45.78                  | 3.99                      | 224                          |
| Q11                                         | 7.05            | 3R         | 14.57-14.98                               | 63.92-65.00                  | 4.03                      | 41                           |

  

| <b>Copper-specific Developmental Viability QTL: B panel</b> |                 |            |                                           |                              |                           |                              |
|-------------------------------------------------------------|-----------------|------------|-------------------------------------------|------------------------------|---------------------------|------------------------------|
| <b>QTL</b>                                                  | <b>Peak LOD</b> | <b>Chr</b> | <b>Physical Interval (Mb)<sup>a</sup></b> | <b>Genetic Interval (cM)</b> | <b>Variance Explained</b> | <b>No. Genes<sup>b</sup></b> |
| Q13                                                         | 7.11            | 2R         | 13.30-13.95                               | 82.37-84.50                  | 27.9                      | 125                          |
| Q14                                                         | 7.74            | 2R         | 16.19-16.66                               | 90.86-92.45                  | 30.0                      | 60                           |
| Q15                                                         | 8.65            | 3R         | 14.52-15.06                               | 63.79-65.21                  | 32.8                      | 62                           |

<sup>a</sup>Physical intervals are based on FlyBase release 5 of the *D. melanogaster* reference genome.

<sup>b</sup>Protein coding genes only. All genes including ncRNA and pseudogenes are included in Table S4.

481  
 482  
 483  
 484 We did not find any QTL contributing to food consumption on either control or copper-  
 485 supplemented food or copper-specific development time using both a strict ( $\alpha = 0.05$ ) and  
 486 relaxed ( $\alpha = 0.2$ ) significance threshold, but we did find three QTL that contributed to variation

487 in copper-specific developmental viability (Figure 5B). Given we only phenotyped 100 DSPR  
488 strains, power deficits certainly contribute to the low numbers of QTL identified for these traits  
489 (King et al. 2012a). Additionally, due to Beavis effects (Beavis et al. 1991; King and Long 2017),  
490 estimates of QTL effects based on 100 DSPR strains are typically overestimated (King and Long  
491 2017), so the relatively high estimates of the variance explained by the QTL mapped for  
492 developmental viability (Table 1) should be interpreted with care.

493 One copper-specific developmental viability QTL (Q15) overlapped with a QTL (Q11)  
494 associated with adult copper resistance in the B panel (Figure 5). The 2-LOD drop interval of Q11  
495 fell entirely within the 3-LOD drop interval of Q15. Multiparental mapping panels allow  
496 estimation of the effects of the founder haplotypes at mapped QTL. To assess whether the  
497 founder haplotypes contributed to adult copper resistance and copper-specific developmental  
498 viability in similar ways, we tested the correlation between the estimated founder effects at the  
499 shared QTL. Given that the location of the copper-specific developmental viability Q15 peak may  
500 be poorly estimated due to the low sample size employed for mapping, we compared the  
501 haplotype effects from the adult and developmental datasets at the peak position of the Q11  
502 adult copper resistance QTL. These estimated founder effects were significantly positively  
503 correlated ( $F_{1,5} = 7.11$ ,  $P = 0.04$ ,  $R^2 = 59\%$ ; Table S2N, Figure 6), suggesting that the alleles at the  
504 estimated QTL peak position of Q15 and Q11 influence the response to copper stress in adults  
505 and developing individuals in a similar way. This result implies that the adult and developmental  
506 response to copper stress are not fully independent, as was suggested by the very weak  
507 phenotypic correlation between these traits (Figure 4).

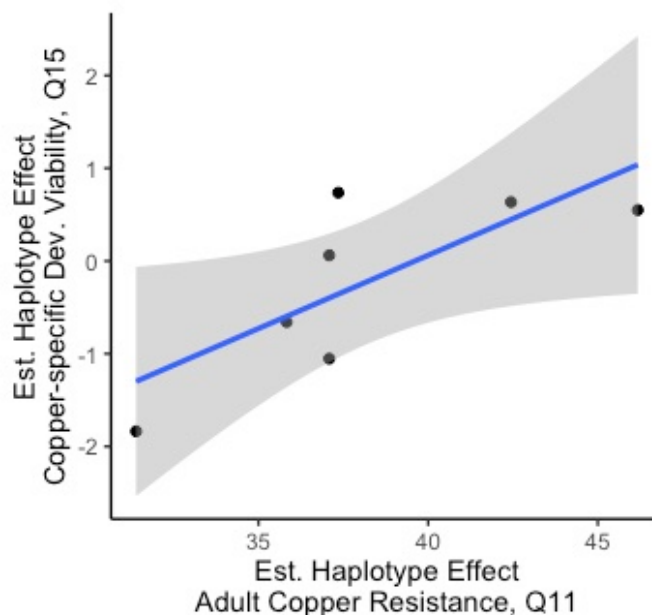

508  
509 **Figure 6.** Founder haplotype effects for copper-specific developmental viability and adult copper resistance  
510 estimated at a shared QTL position on chromosome 3R were significantly positively correlated ( $P = 0.04$ ,  
511  $R^2 = 59\%$ ). Grey shading indicates the 95% CI of the regression between estimated founder haplotype  
512 effects at Q11 for adult copper resistance and at the equivalent genomic position for copper-specific  
513 developmental viability, which resides within Q15.

514

515

516

### 517 Genes implicated by mapped QTL

518 Combined across panels, the QTL regions associated with adult copper resistance include  
519 a total of 1823 unique protein coding genes. Of these, 10 genes have been previously associated  
520 with copper homeostasis, binding, chaperone activity, or copper cell development (Table S4).  
521 Promising copper-associated candidate genes include *Syx5*, *Grx1*, *CG11825*, *Ccs*, *Sod3*, and  
522 *CG5235*. *Syntaxin 5* (*Syx5*), associated with Q2, *Glutaredoxin 1* (*Grx1*), associated with Q9, and  
523 *CG11825*, associated with Q5, are all thought to play a role in copper ion homeostasis (Norgate  
524 et al. 2007, 2010; Mercer and Burke 2016). *Syx5* is required for normal uptake of cellular copper,  
525 and it plays a critical role in copper ion homeostasis in *D. melanogaster* that is independent of  
526 other copper transporter proteins such as *Ctr1A/B* (Norgate et al. 2010). Similarly, *Grx1*  
527 knockdown results in copper deficiency, and this gene may function as a mediator of copper



528 transfer to chaperone proteins (Mercer and Burke 2016). *CG11825* has been identified as a  
529 candidate for copper ion homeostasis in *D. melanogaster* by (Norgate et al. 2007), but functional  
530 testing is lacking for this gene under copper stress conditions. The gene copper chaperone for  
531 superoxide dismutase (*Ccs*), found under Q5, is an important chaperone protein that shuttles  
532 copper ions to *Sod1* under normal conditions (Culotta et al. 1997; Schmidt et al. 2000). Genetic  
533 ablation of *Ccs* in *D. melanogaster* resulted in increased sensitivity to oxidative stress following  
534 paraquat exposure (Kirby et al. 2008); however, the effect of *Ccs* knockdown under copper stress  
535 conditions has not been assessed. Genes previously associated with copper ion binding include  
536 *Sod3* (Q6) and *CG5235* (Q8). While *Sod3* functions as an extracellular receptor for copper ions  
537 and is protective against oxidative stress (Blackney et al. 2014), the link between *CG5235* and  
538 copper is based only on prediction informed by gene ontology (Gaudet et al. 2011). In addition  
539 to these copper-associated genes, we observed 64 genes with functions related to homeostasis  
540 or detoxification of zinc, 2 genes involved with manganese regulation, and 19 genes involved in  
541 binding unspecified metals. Of particular interest among these genes are *Catsup* (Q3), *ZnT41F*  
542 (Q4), and *stl* (Q7), which are all associated with zinc transport or detoxification (Yepiskoposyan  
543 et al. 2006; Ozdowski et al. 2009; Lye et al. 2013; Navarro and Schneuwly 2017), *trpl* (Q5) and  
544 *DCP2* (Q8), which are hypothesized to be involved in manganese ion binding (Thurmond *et al.*  
545 2019), and *swm* (Q3), *babo* (Q5), and *whd* (Q5), which are thought to be involved in binding of  
546 unspecified metal ions based on gene ontology prediction (Gaudet *et al.* 2011; Thurmond *et al.*  
547 2019).

548 The three QTL associated with copper-specific developmental viability spanned a total of  
549 247 unique protein coding genes. Of these genes, none had functions previously linked to copper.  
550 However, 8 genes were associated with zinc ion binding, and two were linked to metal ion binding  
551 through gene ontology prediction (Table S4; (Gaudet *et al.* 2011; Thurmond *et al.* 2019)). Most  
552 notable among the genes identified by copper-specific developmental viability QTL was *mekk1*  
553 (Q15), which was demonstrated through gene knockdown to be the primary activator of JNK  
554 signaling under cadmium stress in *Drosophila* S2 cells (Ryabinina et al. 2006). Although the Q15  
555 developmental viability QTL overlaps with the adult copper resistance QTL Q11, *mekk1* is only

556 present within the interval implicated by Q15. Given that *mekk1* is within 11.2Kb of the Q11 2-  
557 LOD drop interval, this gene may still be a plausible candidate for adult copper resistance.

558 We performed GO enrichment analysis with genes implicated by adult copper resistance  
559 QTL in both the A and B panels as well as with genes implicated by QTL associated with copper-  
560 specific developmental viability with FlyMine (Lyne et al. 2007). No GO enrichment was observed  
561 for genes included in QTL intervals for either panel or life stage. This is unsurprising given that  
562 QTL intervals include many genes that are likely to be non-causative and potentially obscure any  
563 signal of enrichment.

#### 564 **Differential gene expression due to treatment and resistance class**

565 Allelic effects on variation in complex traits are commonly mediated by regulatory  
566 variation (Roelofs et al. 2006; Ruden et al. 2009; Boyle et al. 2017; GTEx Consortium et al. 2018).  
567 We used an RNA sequencing approach to examine the effects of copper stress on gene regulation  
568 and to assess any differences in this response between genotypes with high or low adult copper  
569 resistance. We sequenced mRNA from whole females from 6 high (79 – 98%) and 4 low (0 – 18%)  
570 adult copper resistance strains from the B panel following a 9-hour exposure to control (water)  
571 and 50mM CuSO<sub>4</sub> conditions. A primary goal was to determine whether there are consistent  
572 differences in gene expression between high and low resistance classes of strains when exposed  
573 to copper stress, so we treated each strain as a replicate of the high and low resistance classes.

574 The interaction between treatment (control vs 50mM CuSO<sub>4</sub>) and resistance class was not  
575 significant at a 5% FDR or at a relaxed cutoff of 20%, so this term was dropped from the model  
576 and the treatment (TRT) and resistance class (RES) terms were assessed additively. After  
577 additional filtering (see methods), we identified 1589 genes that were differentially expressed  
578 across treatment and adult copper resistance class with the full model (full model: ~ TRT + RES  
579 vs reduced model: ~ 1). We used PCA with quantile-normalized filtered TPM data from these  
580 1589 genes to explore the patterns of gene expression among the sampled strains and  
581 treatments, finding a pronounced effect of gene expression on treatment, with a more subtle  
582 effect on resistance class (Figure 7, Table S5).

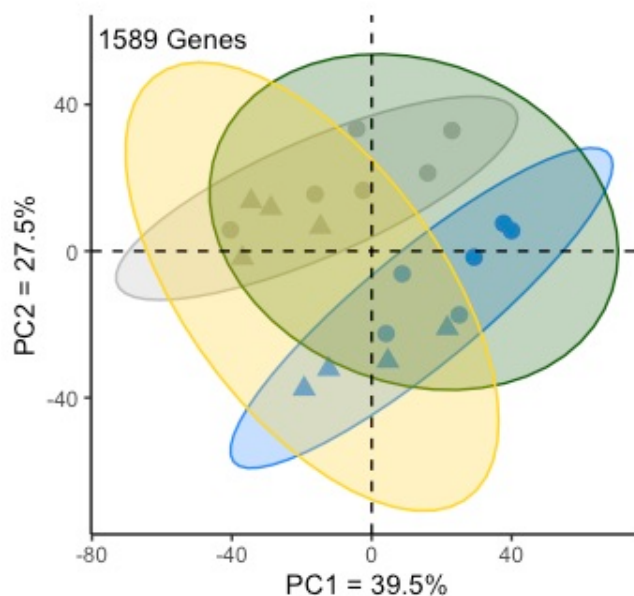

583  
584 **Figure 7.** Principal components analysis of significantly differentially expressed genes (quantile-normalized  
585 filtered TPM) identified by the full model (full model:  $\sim$  TRT + RES vs reduced model:  $\sim$  1). The effect of  
586 treatment was pronounced among samples, while the effect of resistance level was more subtle. Ellipses  
587 indicate the equivalent of a 95% confidence interval. Blue indicates copper-exposed samples, grey indicates  
588 control-exposed samples, green indicates resistant strains, yellow indicates sensitive strains. Triangle  
589 points indicate sensitive strains; circles indicate resistant strains.

590  
591  
592

593 To further explore how each of the main effects of the differential expression model  
594 influence gene expression, and to identify sets of genes that were influenced primarily by  
595 treatment or resistance class, we tested the effects of treatment and resistance class separately.  
596 Treatment alone (treatment model:  $\sim$  TRT + RES vs. reduced model:  $\sim$  RES) primarily contributed  
597 to differential expression in 848 genes, and adult copper resistance alone (resistance model:  $\sim$   
598 TRT + RES vs. reduced model:  $\sim$  TRT) primarily contributed to differential expression in 466 genes.  
599 The vast majority of genes influenced by treatment and resistance class were included among  
600 the 1589 genes identified with the full model (92% of genes identified with the treatment model,  
601 91% of genes identified with the resistance model). Of the 848 and 466 genes identified with the  
602 treatment and resistance class models, 58 genes were shared. The proportion of shared genes  
603 increased when a more relaxed significance threshold (20% FDR) was used in the treatment and

604 resistance class models, and the estimated effects of resistance class and treatment on gene  
605 expression in each DE gene list were weakly positively correlated (Treatment Model:  $R^2 = 8\%$ ;  
606 Resistance Class Model:  $R^2 = 2\%$ ). While the DE gene lists attributed to treatment and resistance  
607 class are not fully independent, they represent sets of genes for which the primary source of  
608 variation is either treatment or resistance class.

609 To broadly characterize DE genes identified in the treatment and resistance class models,  
610 we performed GO analysis with FlyMine (Lyne et al. 2007) for each gene list separately. GO  
611 analysis of each complete DE gene list is summarized in Table S6. Briefly, 111 GO terms were  
612 identified from the full model DE gene list and included terms related to cell organization, cell  
613 cycle, and metabolism among the top 10 (Table S6). Enrichment for 23 GO terms including those  
614 related to cytoplasmic translation, ribosome biogenesis, and RNA processing was observed for  
615 the 848 genes influenced by treatment (Table S6). Fifty-nine GO terms were identified from the  
616 466 DE genes due to resistance class. Top among these GO terms were those related to ATP  
617 synthesis, cellular respiration, and mitochondrial function (Table S6). GO analysis of this set of 58  
618 genes revealed enrichment for female gamete generation [*GO:0007292*] ( $P = 0.006$ ), and no  
619 genes had any connection to copper or metal ion homeostasis to our knowledge. Many of the  
620 genes with DE due to treatment and/or resistance class fell within the QTL intervals for adult  
621 copper resistance or copper-specific developmental viability (Figure 5). Notably, no enrichment  
622 was observed for any GO term related to metal ion homeostasis or detoxification when the total  
623 DE gene lists were considered (but see below). Of the 848 genes with DE due to treatment, 87  
624 (11%) overlapped with QTL intervals, and of the 466 genes with DE due to resistance class, 62  
625 genes (13.3%) overlapped with QTL intervals. Of the 58 genes shared between the treatment and  
626 resistance class models, 12 genes (20.6%) overlapped with QTL intervals (Figure 5). DE genes from  
627 the treatment and resistance class models were not more likely than expected by chance to fall  
628 within QTL intervals ( $\chi^2 = 14.5$ ,  $df = 14$ ,  $P = 0.41$ ), although this does not preclude the possibility  
629 that those DE genes within mapped QTL are strong candidates to carry variation contributing to  
630 copper resistance.

631 To further explore the influence of resistance class on gene expression, we calculated the  
632 average change in gene expression following copper exposure for each of the 1589 DE genes

633 from the full model using the same filtered TPM data used for PCA for the high and low resistance  
634 classes. The absolute values of these data were then log transformed to reduce spread, and the  
635 sign of the change in gene expression was restored by multiplying the result by 1 or -1. Copper-  
636 induced genes had higher expression under copper conditions, while copper-repressed genes  
637 had lower expression under copper conditions.

638         Of the 848 DE genes identified in the treatment model, there was a roughly even split  
639 between induced and repressed genes, with no difference between the resistance classes  
640 (Kolmogorov-Smirnov (KS) test:  $D = 0.05$ ,  $P = 0.33$ ; Figure 8A). Among the top 20 most highly  
641 induced genes under copper conditions in both resistant and sensitive classes were several MTs  
642 (*MtnA*, *MtnC*, *MtnD*, *MtnE*) as well as two genes that comprise a major iron storage complex  
643 (*Fer1HCH* and *Fer2LCH*). Because these genes and other genes with DE due to treatment were  
644 induced in sensitive and resistant strains to similar degree, we suggest that sensitivity to copper  
645 is not due to a failure to induce expression of genes with protective functions against copper ions.  
646 Among the 466 DE genes identified in the resistance model, gene induction by copper was more  
647 frequently observed in sensitive strains compared to resistant strains (KS test:  $D = 0.27$ ,  $P <$   
648  $0.00001$ ; Figure 8B). The top 20 most highly induced genes under copper conditions in sensitive  
649 strains included several genes that are involved in mitochondrial structure, function, and energy  
650 synthesis (e.g. *Ald1*, *levy*, *sesB*, *Mpcp1*, *COX5A*, *ATPsynb*), suggesting more sensitive strains may  
651 be characterized by a greater susceptibility to oxidative stress.

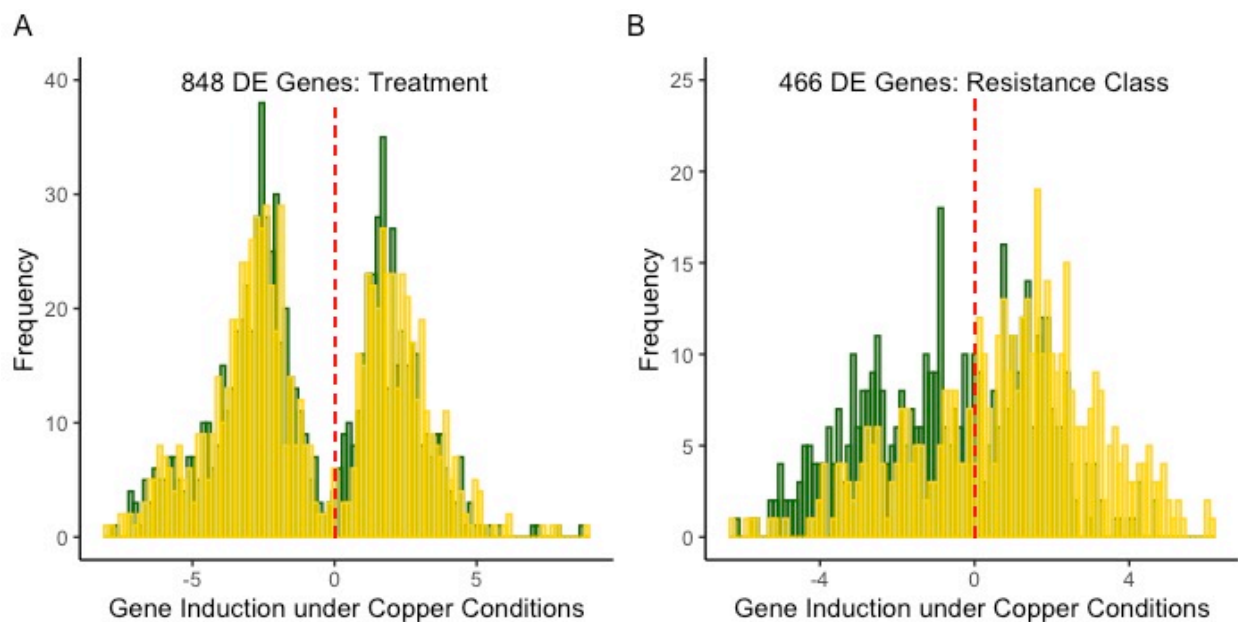

652  
653 **Figure 8.** Induction of genes under copper conditions with DE identified from the treatment model (A) and  
654 the resistance model (B). A. The effect of treatment on DE highlights that roughly equal numbers of genes  
655 were induced or repressed under copper conditions (KS-test:  $D = 0.05$ ,  $P = 0.33$ ). B. Among DE genes  
656 identified by the resistance model, genes were more likely to be induced by copper exposure in sensitive  
657 strains compared to resistant strains (KS-test:  $D = 0.27$ ,  $P < 0.001$ ). In each plot, yellow bars indicate gene  
658 expression in sensitive strains and green bars indicate gene expression in resistant strains.

659

660

661

## 662 Cluster analysis of differentially expressed genes

663 The patterns of copper-induced gene expression across treatment and resistance class  
664 observed in Figure 8A and B raise the question of whether there are co-regulated sets of genes  
665 that distinguish resistant and sensitive strains under copper and control conditions. For example,  
666 the presence of metal-associated genes among the those induced by treatment may signal a  
667 larger network of genes that are co-regulated in response to heavy metal stress. To identify any  
668 such co-regulated groups, we used Clust (Abu-Jamous and Kelly 2018) to identify non-overlapping  
669 clusters of genes from the 848 genes influenced by treatment and the 466 genes influenced by  
670 resistance class using quantile-normalized, filtered TPM data. We then performed GO analysis on  
671 any resulting clusters formed from the two sets of genes with FlyMine (Lyne et al. 2007).

672 Clust identified 3 clusters of co-regulated genes with DE due to treatment (Figure S7A).  
673 Treatment clusters 1 (101 genes) and 2 (17 genes) consisted primarily of genes that were induced  
674 by copper exposure, while treatment cluster 3 (17 genes) consisted solely of genes that were  
675 copper-repressed (Figure S7A). While top GO terms for treatment clusters 1 and 3 revealed  
676 enrichment for genes involved in processes unrelated to metal ion homeostasis or response (e.g.  
677 cell cycle, RNA processing; Table S6), treatment cluster 2 was enriched for genes involved in iron  
678 import, transport, and detoxification of iron and inorganic compounds (Table S6). Gene  
679 enrichment in treatment cluster 2 is consistent with our expectation that copper-induced genes  
680 will include those that are involved in the response to toxic metal ion exposure. Interestingly,  
681 only one of the genes (*Gclc*) in treatment cluster 2 has been previously directly associated with  
682 copper through its interactions with the copper transport proteins *Ctr1A* and *ATP7*. Also included  
683 in treatment cluster 2 are *Fer1HCH* and *Fer2LCH*, which are primarily involved with iron storage  
684 but may interact with copper ions during protein assembly (Huard et al. 2013). Treatment clusters  
685 1 and 3 included 17 and four genes, respectively, that were implicated by adult copper resistance-  
686 associated QTL (Figure S7A). The gene *dnk* in treatment cluster 1 was also implicated by the  
687 copper-specific developmental viability QTL Q15 (Figure S7A). Two of the genes (*CG11878* and  
688 *CG5506*) identified in treatment cluster 2 were implicated by adult copper resistance-associated  
689 QTL intervals (Figure S7). One gene, *CG5506*, was empirically demonstrated to interact with  
690 *Fer2HCH* (Guruharsha et al. 2011); however, neither gene has been previously associated with  
691 copper exposure.

692 Clust identified 2 clusters of co-regulated genes that were differentially expressed due to  
693 resistance class (Figure S7B). Resistance cluster 1 (75 genes) was primarily enriched for genes  
694 involved in cell cycle processes (Table S6), and 11 genes were also implicated by adult copper  
695 resistance QTL. Resistance cluster 2 (56 genes) included genes that were more often copper-  
696 induced in sensitive strains and copper-repressed in resistant strains (Figure S7B). Resistance  
697 cluster 2 was enriched for two broader categories of GO terms including several related to muscle  
698 structure (e.g. myofibril assembly [*GO:0030239*],  $P < 0.00001$ ) and mitochondrial function and  
699 energy synthesis (e.g. ATP metabolic process [*GO:0046034*],  $P < 0.00001$ ). Resistance cluster 2  
700 also included genes involved in inorganic ion homeostasis [*GO:0098771*], although enrichment

701 for this GO term was weak ( $P = 0.05$ ). Of the genes involved in inorganic ion homeostasis, three  
702 (*CG14757*, *trpl*, and *sesB*) are particularly noteworthy given that all three genes are copper-  
703 induced in sensitive strains and copper-repressed in resistant strains, and two have been  
704 previously linked to metal ion homeostasis (Figure 9). Exposure of the *Drosophila* S2 cell line to  
705 2mM  $\text{CuSO}_4$  resulted in increased expression of *CG14757*, indicating that this gene is responsive  
706 to copper stress (Norgate et al. 2007); however, its exact function relative to the toxic effects of  
707 copper has not been elucidated. The gene *trpl* is predicted to be involved in manganese ion  
708 binding (Thurmond et al. 2019) and was included in the adult copper resistance-associated QTL  
709 Q5 in this study. *sesB* is a mitochondrial transporter gene that was demonstrated to be important  
710 for protection against oxidative stress through gene knockdown in *D. melanogaster* (Terhzaz et  
711 al. 2010). Other genes included in this group (*up*, *SERCA*, and *nrv3*; Figure 9) are involved in  
712 transport of calcium, sodium, and potassium (Domingo et al. 1998; Gaudet et al. 2011) or are  
713 thought to be involved in ATP metabolism (*Vha68-1*) (Thurmond et al. 2019). In addition to *trpl*,  
714 2 other genes from resistance cluster 2 were implicated by adult copper resistance QTL.

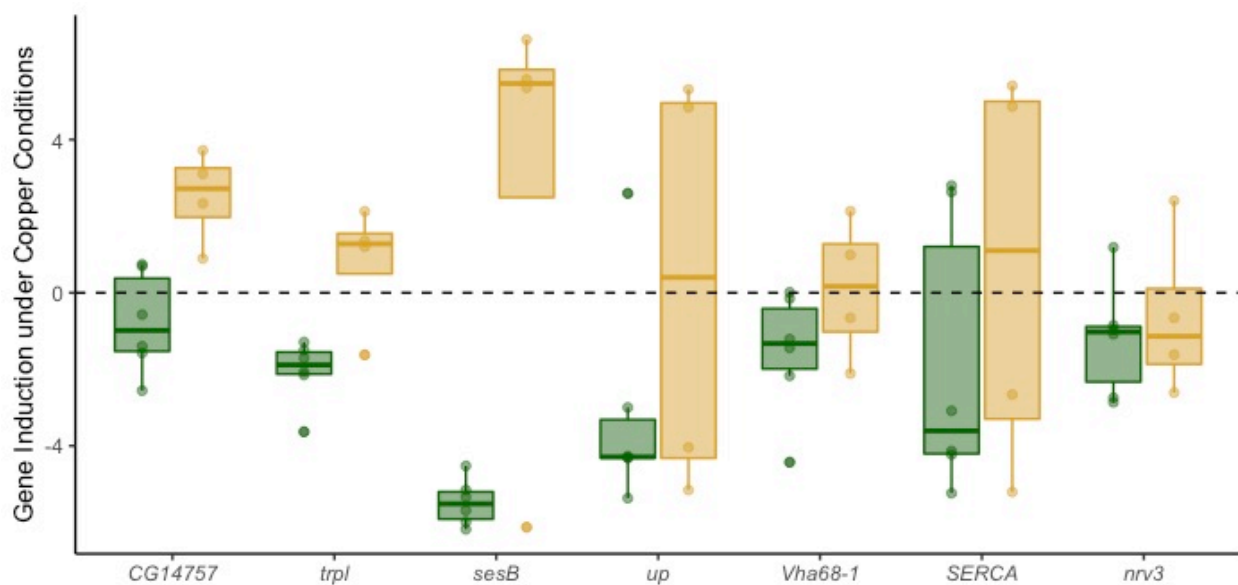

715 **Figure 9.** Copper-induced expression of genes involved in inorganic ion homeostasis that were included in  
716 resistance cluster 2. Resistant strains are shown in green, sensitive strains are shown in yellow.  
717

718  
719  
720



## 721 **RNAi knockdown of candidate genes associated with adult copper survival**

722 Several genes with links to copper or metal ion homeostasis were implicated by QTL or  
723 were differentially expressed due to treatment or resistance class (see above) (Table S3). We  
724 picked 16 genes to functionally test using RNAi knockdown. QTL-implicated genes included  
725 *Catsup* and *swm* (Q3), *ZnT41F* (Q4), *CG11825*, *whd*, *babo*, and *Ccs* (Q5), *stl* (Q7), *DCP2* and *CG5235*  
726 (Q8). We also tested *trpl* (Q5), which, along with *Mvl*, was among the DE genes influenced by  
727 resistance class. Because *Ccs* and both *Sod1* and *Sod2* closely interact, we tested *Sod1/2* even  
728 though these genes were not implicated by either QTL or RNAseq. From genes with DE due to  
729 treatment, we tested *MtnC* and *CG10505*. Of these candidate genes, only *Sod1*, *MtnC*, and *Mvl*  
730 have been previously specifically linked to copper stress (Calap-Quintana et al. 2017). *Ccs*,  
731 *CG5235*, *Sod1*, *CG11825*, and *CG10505* are all associated with copper transport or binding. The  
732 remaining candidate genes (*trpl*, *DCP2*, *whd*, *stl*, *swm*, *babo*, *Catsup*, and *ZnT41F*) have not been  
733 experimentally linked to copper stress, but are associated with metal ion binding or homeostasis.

734 Genes were tested using TRiP UAS RNAi strains (Perkins et al. 2015) that were crossed to  
735 a background with a ubiquitously expressed Gal4-expressing driver resulting in knockdown in the  
736 whole animal and to a background with an anterior midgut-specific Gal4-expressing driver  
737 resulting in knockdown in this specific region of the midgut. We measured average lifespan of all  
738 knockdown genotypes on 50mM CuSO<sub>4</sub> with at least 10 replicates.

739 In general, more genes influenced copper resistance when they were knocked down in  
740 the whole animal compared to when candidates were knocked down in the anterior midgut  
741 (Figure 10). Of the candidate genes with known associations with copper, *Ccs*, *CG5235 (b)*, *MtnC*  
742 (*b*), and *Sod1* reduced copper resistance relative to the control when knocked down in the whole  
743 animal using the ubiquitous driver (Figure 10A). Inconsistent effects of ubiquitous *CG5235*  
744 knockdown may be influenced by vector efficiency; the knockdown vector for *CG5235 (a)* is a  
745 long dsRNA vector (VALIUM10), while the knockdown vector for *CG5235 (b)* is a shRNA vector  
746 (VALIUM20). Both TRiP strains for *MtnC* used the same vector (VALIUM20) (Perkins et al. 2015);  
747 however, these two strains target *MtnC* at different locations within the gene, and knockdown  
748 efficiency may differ between the two sites. Knockdown of copper-associated genes in the  
749 anterior midgut did not influence copper resistance relative to the control, suggesting that

750 reduced expression of *Ccs*, *CG5235*, *Sod1*, *CG11825*, and *CG10505* in this limited region of the  
 751 midgut does not hinder the fly's ability to cope with copper stress (Figure 10B).

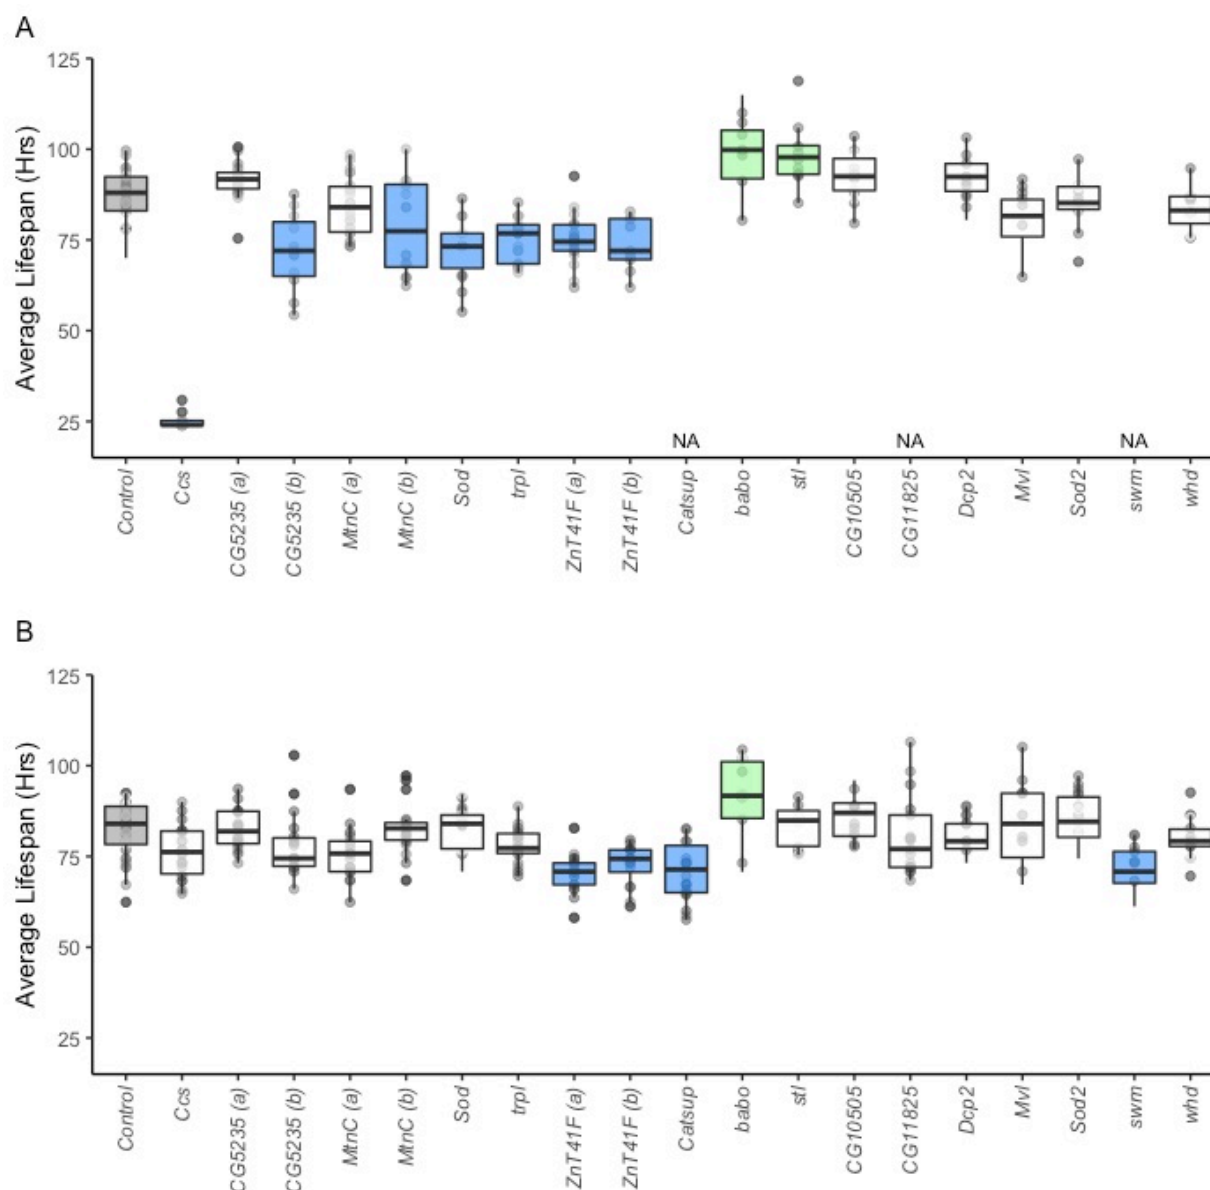

752 **Figure 10.** Average lifespan of TRiP UAS RNAi knockdown strains crossed to a ubiquitous Gal4-expressing  
 753 driver (A) and to an anterior-specific Gal4-expressing driver (B). A. Increased susceptibility was observed  
 754 with knockdown of *Ccs*, *CG5235* (b), *MtnC* (b), *Sod*, *trpl*, and *ZnT41F* with the ubiquitous Gal4 driver.  
 755 Knockdown of *babo* resulted in increased resistance to copper toxicity relative to the control. B. Knockdown  
 756 in the anterior midgut of *Catsup*, *swm*, and *ZnT41F* resulted in increased susceptibility to copper toxicity,  
 757 while knock down of *babo* increased resistance relative to the control. In each plot, grey shading indicates  
 758 the control, green shading indicates increased resistance to copper, blue shading indicates decreased  
 759 resistance, and no shading indicates lack of a significant difference based on an experiment-wide  $\alpha = 0.05$ .  
 760 Three candidate gene TRiP strains (*swm*, *Catsup*, and *CG11825*) produced too few flies to test when crossed  
 761 to the ubiquitous Gal4-expressing driver, and were thus excluded from our analysis. We tested multiple  
 762

763 *TRiP UAS RNAi strains for genes CG5235 (CG5235 (a), CG5235 (b)), MtnC (MtnC (a), MtnC (b)), and ZnT41F*  
764 *(ZnT41F (a), ZnT41F (b)) to assess the consistency in the effect of gene knockdown on copper survival (Table*  
765 *S3).*

766

767

768

769 The candidate gene *ZnT41F* consistently reduced copper resistance relative to control  
770 when knocked down in the whole animal and in the anterior midgut. While *ZnT41F* was  
771 previously shown to indirectly affect zinc homeostasis (Yin et al. 2017), the role it plays in copper  
772 ion homeostasis has not been described. Similarly, *Catsup* and *swm*, which have not been  
773 previously linked to copper, reduced copper resistance when knocked down in the anterior  
774 midgut. That knockdown of these genes in the whole animal did not influence copper resistance  
775 suggests these genes interact with copper soon after ingestion, although this would require  
776 additional follow-up to confirm. Interestingly, knockdown of *babo* in both the whole animal and  
777 the anterior midgut increased copper resistance relative to the controls (Figure 10). Knockdown  
778 of *stl* in the whole animal had a similar effect. Both genes are predicted to be involved in metal  
779 ion binding (Gaudet *et al.* 2011; Thurmond *et al.* 2019), but any additional evidence linking them  
780 to the detoxification of heavy metal ions under stressful conditions is lacking.

## 781 **Discussion**

### 782 **Variation in heavy metal stress is influenced by a complex genetic architecture**

783 *D. melanogaster* has been a particularly important model for elucidating the roles of  
784 genes involved in the response to copper and other heavy metals (e.g. Egli et al. 2003, 2006a; b;  
785 Balamurugan et al. 2004, 2007; Yepiskoposyan et al. 2006; Calap-Quintana et al. 2017). In our  
786 study, we used this model to investigate the role of genetic diversity in resistance to the heavy  
787 metal copper. We used a combination of QTL mapping and RNA sequencing to characterize allelic  
788 and gene expression variation that influences resistance to copper stress in strains from the  
789 multiparental DSPR mapping panel. In comparison with previous reports investigating the genetic  
790 architecture of copper and resistance to other heavy metals in plants (Macnair 1993; Selby and  
791 Willis 2018), the genetic architecture of copper resistance in *D. melanogaster* appears to be more

792 complex. Where one to three QTL were identified for heavy metal resistance in several plant  
793 species including *Mimulus guttatus*, wheat, and corn (Allen 1971; Macnair 1983, 1993; MacNair  
794 et al. 1993; Bálint et al. 2007; Selby and Willis 2018), we identified 12 QTL that underlie variation  
795 in adult copper resistance (Figure 5A), and found that the diverse DSPR strains varied widely in  
796 survival following exposure to copper stress (Figure 1).

797 Part of the difference in apparent complexity underlying the response to copper is likely  
798 due to the higher power of our mapping panel, which employs a much larger number of  
799 genetically diverse strains coupled with higher genetic marker density compared to the mapping  
800 populations used in plant studies (e.g. Willems et al. 2007; and Courbot et al. 2007; King et al.  
801 2012a). Secondly, the structure of the DSPR may be particularly conducive for detecting allelic  
802 variation in genes that influence the response to copper stress given the global sampling of  
803 founder strains used to generate the DSPR (King et al. 2012a), which may capture more of the  
804 natural variation for copper resistance than that present in any one natural population. Third, in  
805 contrast to natural populations which are often of interest because of their proximity to heavy  
806 metal pollution (e.g. Allen 1971; Macnair 1983; Ramirez et al. 2005; Turner et al. 2010; Wuana  
807 and Okieimen 2011; Wright et al. 2015; Arnold et al. 2016), the DSPR is naïve to any form of heavy  
808 metal selection or stress. Strong selection for heavy metal resistance could reduce variation at  
809 causative genes and lead to an apparent reduction in the complexity of resistance (Arnold et al.  
810 2016).

811 The level of genetic complexity for copper resistance described in our study is consistent  
812 with reports of metal resistance in flies, yeast, and worms where measures of resistance were  
813 conducted in other heavy metal-naïve mapping populations. The DGRP (*Drosophila* Genetic  
814 Reference Panel (Mackay et al. 2012)), another large *D. melanogaster* mapping panel, was used  
815 to demonstrate a complex genetic architecture for heavy metal exposure through GWA (genome  
816 wide association) and extreme QTL mapping (i.e. sequencing and comparing pools of individuals  
817 with divergent phenotypes) in adult and developing life stages (Montgomery et al. 2014; Zhou et  
818 al. 2016, 2017). In these studies, tens to hundreds of genes have been implicated in natural  
819 genetic screens for lead (Zhou et al. 2016, 2017), cadmium (Zhou et al. 2017), and methylmercury  
820 (Montgomery et al. 2014). In *Saccharomyces cerevisiae* using several extreme QTL mapping

821 pools, Ehrenreich et al. (2012) demonstrated that more than 20 distinct loci were associated with  
822 resistance to cadmium and nearly 40 loci were associated with copper resistance. In  
823 *Caenorhabditis elegans*, Evans et al. (2018) found 4, 6, and 6 QTL associated with the response  
824 to cadmium, copper, and silver, respectively.

825 Interestingly, each of the studies mentioned above generated largely distinct lists of genes  
826 associated with the responses to the heavy metals tested, and overlap between candidate genes  
827 from Zhou et al. (2016) and (2017), Montgomery et al. (2014), Ehrenreich et al. (2012), and Evans  
828 et al. (2018) and the current study is minimal as well (Table S4, Table S5). It is worth noting that  
829 none of these shared genes (Table S4, Table S5) have been previously associated with heavy  
830 metal toxicity or homeostasis and would require additional validation to determine whether they  
831 are causative for resistance to any heavy metals. However, overlap in candidate genes identified  
832 for the response to different heavy metals raises the possibility that a single gene or gene  
833 network may influence the response to multiple heavy metals. Consistency in genetic  
834 architectures underlying the response to chemical stressors has been examined using large *S.*  
835 *cerevisiae* and *C. elegans* mapping panels (Ehrenreich et al. 2010; Evans et al. 2018), and while  
836 there is some evidence for shared genetic architectures between traits, it is clear that each toxin  
837 response is influenced by a largely trait-specific genetic architecture. For example, out of 82 QTL  
838 that were identified for 16 different toxins ranging from heavy metals to cancer therapy drugs,  
839 Evans et al. (2018) found three QTL hotspots that were implicated for multiple types of toxins.  
840 Similarly, Ehrenreich et al. (2010) showed that ~20% of QTL detected in their study were shared  
841 between 2 – 5 of 17 different chemical stressors in yeast. Only one QTL was shared between  
842 more than five different chemical stressors (Ehrenreich et al. 2010). In a later study Ehrenreich  
843 et al. (2012) demonstrated similarly low levels of consistency in genetic architecture through  
844 extreme QTL mapping of 13 chemicals. Although we did not measure resistance to multiple heavy  
845 metal stressors in our study, we functionally validated several candidate genes implicated by QTL  
846 and DE gene lists which had functions linked to other metals including zinc, lead, manganese, and  
847 cadmium, or that were not linked to a specific metal (e.g *swm* (Q3), *babo* (Q5), and *stl* (Q5); Figure  
848 10). Pleiotropic gene effects inferred from our RNAi analyses may be the result of metal-sensitive  
849 genes responding to a generalized set of cytotoxic effects stemming from production of reactive

850 oxygen species caused by heavy metal toxicity (Uriu-Adams and Keen 2005). This hypothesis is  
851 further supported by evidence of copper-induced expression of genes involved in oxidative stress  
852 response in sensitive strains that are repressed in resistant strains (e.g. *sesB*, Figure S7B, Figure  
853 9). However, additional tests of the response of DSPR strains to a diverse set of heavy metals is  
854 needed to fully understand whether the non-copper candidate genes we identified have  
855 correlated effects on resistance to other heavy metals.

### 856 **Consistency in the genetic architecture of Copper resistance across life stages**

857 Genes that are involved in copper homeostasis in *D. melanogaster* adults have in some  
858 cases also been shown to regulate copper in larvae. For example, exposure of larvae to CuSO<sub>4</sub>  
859 induces expression of MTs (Egli et al. 2003, 2006b), and we demonstrated a copper-induced  
860 increase in MT expression in adults (Table S5). Knockdown of copper transporter genes in the  
861 CTR family alters copper homeostasis in both larvae and adult flies as well (Zhou et al. 2003;  
862 Turski and Thiele 2007). Given the similar genetic responses to copper in adults and larvae, we  
863 expected that the physiological response to copper stress would be correlated between life  
864 stages. It was previously established that developmental life stages are more susceptible to  
865 copper stress compared to adults; whereas adults were shown to survive for 80 days on 1mM  
866 CuSO<sub>4</sub>, developmental viability from egg to adult on 1mM CuSO<sub>4</sub> was less than 10% in the same  
867 strain (Bahadorani and Hilliker 2009). Our goal was to understand the relationship between adult  
868 copper resistance and the effect of copper stress on development in a set of genetically diverse  
869 *D. melanogaster* strains.

870 Similar to previous reports, we found that copper stress delayed development and  
871 reduced viability (Zhou et al. 2003; Bahadorani and Hilliker 2009; Pölkki 2016) although to  
872 differing degrees among the DSPR strains (Figure 3), suggesting that as with adult copper  
873 resistance, copper-specific development time and developmental viability are genetically  
874 variable. Despite the lack of a statistically significant correlation between the developmental  
875 responses to copper stress and adult copper resistance (Figure 4), we did observe evidence of  
876 partially shared genetic architectures between copper-specific developmental viability and adult  
877 copper resistance (Figure 5B). Additional testing would be needed to determine whether the  
878 same genes implicated by developmental viability QTL Q15 and adult copper resistance QTL Q11

879 influence copper resistance at each life stage. Our detection of fewer QTL associated with copper-  
880 specific developmental viability may be directly related to the reduced number of genotypes  
881 sampled in our assay. Power to detect a 10% QTL with 100 DSPR strains is less than 20% (King et  
882 al. 2012a), so the actual level of overlap in the genetic architecture between the adult and  
883 developmental viability responses may be higher than we observe. Notably, founder haplotype  
884 frequencies in the full set of lines and the subset of 100 are very similar across the genome (Figure  
885 S8), so it is unlikely the case that the subset fails to capture the same allelic diversity present in  
886 the full set.

887         Because the ecology of the developing and adult stages of *D. melanogaster* are quite  
888 distinct, that copper resistance might be influenced by largely life stage-specific mechanisms is  
889 not unexpected. For example, *D. melanogaster* adults and larvae avoid copper-supplemented  
890 food when given the opportunity (Balamurugan et al. 2007; Bahadorani and Hilliker 2009);  
891 however, in natural populations, higher mobility of adults would allow the adult life stage to  
892 avoid heavy metal contaminated food more effectively. Life-stage specific genetic architectures  
893 were observed in *D. melanogaster* for cold tolerance (Freda et al. 2019), and the decoupling of  
894 the genetic mechanisms that influence survival and fitness have been reported in diverse  
895 organisms with complex life cycles (Moran 1994; Ragland and Kingsolver 2008). However, a  
896 number of other factors including the large difference in copper dose and the nature of the  
897 response tested at each life stage may obscure or complicate the relationship between the  
898 developmental and adult responses we observed. We used a much lower dose in our assessment  
899 of the effect of copper on development time and developmental viability compared to the adult  
900 copper resistance phenotype, and differences in dose can alter the genetic architecture for a  
901 trait. For example, in the yeast *S. cerevisiae*, Wang and Kruglyak (2014) demonstrated that the  
902 overall genetic architecture of haloperidol resistance was dose-dependent. While one QTL was  
903 consistently detected for each of the 5 doses tested, several QTL were only detected at a single  
904 dose (Wang and Kruglyak 2014). With the added complexity of assessing the effects of copper in  
905 different life stages, it is difficult to fully determine whether the effects of copper in the adult  
906 and developmental assays are analogous. Further confounding this comparison, our adult copper  
907 assay was implemented over a 48-hour time period in contrast to exposing developing flies from

908 egg to adult to copper over a period of 30 days at most. The harmful effects of copper on  
909 development may be constant or variable across different stages (egg, larvae, pupation), and this  
910 represents an area of ongoing research.

### 911 **Copper sensitivity is influenced by gene expression variation and behavior**

912 Differences in expression levels of genes that have protective functions against toxins, or  
913 that are co-opted by toxins can lead to variation in resistance levels. For instance in humans,  
914 natural variation in expression levels of the gene *CMG2* is associated with variation in resistance  
915 to anthrax (Martchenko et al. 2012), and in the fungus *Suillus luteus*, selection pressure from  
916 heavy metal pollution quickly led to copy number variation in transport genes with protective  
917 functions against heavy metal toxicity (Bazzicalupo et al. 2019). Sensitivity to copper in adult *D.*  
918 *melanogaster* DSPR strains does not appear to be due to insufficient expression of genes involved  
919 with copper or metal detoxification such as MTs or CTR family transporters (Figure S7, Table S5).  
920 Instead, we found that genes associated with metabolism and mitochondrial function were  
921 copper-induced in sensitive strains and copper-repressed in resistant strains (Figure S7B, Figure  
922 9). Given that we also observed that sensitive strains are more slightly likely to consume copper  
923 in larger amounts in a 24-hour period compared to resistant strains (Figure 2), sensitive strains  
924 may be under greater metabolic stress as they cope with exposure to behaviorally-mediated  
925 higher levels of ingested copper. Copper resistance in *D. melanogaster* may not be simply a  
926 function of how well the organism is able to detoxify food; more likely, copper resistance is a  
927 combination of behavioral aversion to copper and the metabolic stress induced by the amount  
928 of metal consumed in addition to detoxification ability.

929 In general, food consumption rate has a complex genetic basis in *D. melanogaster*  
930 (Garlapow et al. 2015), and when given a choice, both *D. melanogaster* adults and larvae tend to  
931 avoid copper-supplemented food at much lower concentrations relative to those tested in this  
932 study (Balamurugan et al. 2007; Bahadorani and Hilliker 2009). Bahadorani and Hilliker (2009)  
933 showed that adult copper avoidance was observed at 1mM CuSO<sub>4</sub>, and avoidance in third-instar  
934 larvae was observed at 0.25mM CuSO<sub>4</sub> (Balamurugan et al. 2007). Similarly, adult *D.*  
935 *melanogaster* avoid pupation and oviposition on copper-supplemented food (Bahadorani and  
936 Hilliker 2009). While this behavioral component likely plays an important role in mediating



937 copper stress in natural populations, these studies focused on only one or few genetic strains,  
938 making it difficult to extrapolate how a genetically variable population would behave in response  
939 to copper. The correlation between adult copper resistance and copper food consumption in the  
940 100 DSPR strains tested in our study suggests that variation in copper avoidance may play an  
941 important role in overall adult copper resistance. At this point, the specific relationship between  
942 copper consumption rates, metabolic stress, and genetic resistance to copper has not been  
943 characterized, but doing so in future studies has the potential to more clearly define resistance to  
944 ingested toxins compared to an assessment based solely on survival. Important remaining  
945 questions include whether behavioral avoidance and sensitivity to heavy metals are influenced  
946 by variation in chemosensory detection ability (e.g. Arya et al. 2015; He et al. 2016) or variation  
947 in preference for metal-supplemented food (e.g. Highfill et al. 2019). Addressing these questions  
948 with a large panel such as the DSPR will help support our efforts to characterize the relationship  
949 and potential interaction between behavior and genetic capacity for copper resistance.

## 950 **Conclusions**

951 Copper resistance in *D. melanogaster* is genetically complex, is influenced by allelic and  
952 expression variation as well as by variation in behavioral avoidance of copper, and may be  
953 controlled by distinct sets of loci in different life stages. Several genes that have known copper-  
954 specific functions as well as genes that are involved in the regulation of other heavy metals were  
955 identified as potential candidates for variation in adult copper resistance and copper-specific  
956 developmental viability. We demonstrated that nine of these candidates influenced adult copper  
957 resistance, providing evidence of pleiotropic effects of genes previously thought to be associated  
958 with other heavy metals. Copper is just one of many heavy metals that pollute the environment  
959 with negative impacts on humans, fungi, plants, and insects at a global scale. Understanding the  
960 complexity of the genetic basis of copper resistance and the potential sources of variation that  
961 interact with resistance is important for understanding the diverse mechanisms through which  
962 copper pollution can negatively impact organisms.

## 963 **Acknowledgments**

964 ERE was supported by Postdoctoral Fellowships from the NIH (F32 GM133111) and the Kansas  
965 INBRE project (P20 GM103418). The research was supported by NIH R01 OD010974 to SJM and  
966 Anthony Long (UC Irvine), and by NIH R01 ES029922 to SJM, and computational work was  
967 supported by the Kansas INBRE (P20 GM103418). Sequencing was carried out by the KU Genome  
968 Sequencing Core which is supported by the CMADP, an NIH COBRE award (P20 GM103638).  
969 Stocks obtained from the Bloomington Drosophila Stock Center (NIH P40 OD018537) were used  
970 in this study. We thank Robert Unckless and John Kelly for their comments on the manuscript,  
971 and William Jewell College for use of the macro camera lens used in the developmental assays.

972

973

974

975

## References

- Abu-Jamous B., and S. Kelly, 2018 Clust: Automatic extraction of optimal co-expressed gene clusters from gene expression data. <https://doi.org/10.1101/221309>
- Allen W. R., 1971 Copper tolerance in some Californian populations of the monkey flower, *Mimulus guttatus*. Proc. R. Soc. Lond. B Biol. Sci. 177: 177–196. <https://doi.org/10.1098/rspb.1971.0022>
- Arnold B. J., B. Lahner, J. M. DaCosta, C. M. Weisman, J. D. Hollister, *et al.*, 2016 Borrowed alleles and convergence in serpentine adaptation. Proc. Natl. Acad. Sci. 113: 8320–8325. <https://doi.org/10.1073/pnas.1600405113>
- Arya G. H., M. M. Magwire, W. Huang, Y. L. Serrano-Negron, T. F. C. Mackay, *et al.*, 2015 The genetic basis for variation in olfactory behavior in *Drosophila melanogaster*. Chem. Senses 40: 233–243. <https://doi.org/10.1093/chemse/bjv001>
- Babin-Fenske J., and M. Anand, 2011 Patterns of insect communities along a stress gradient following decommissioning of a Cu–Ni smelter. Environ. Pollut. 159: 3036–3043. <https://doi.org/10.1016/j.envpol.2011.04.011>
- Bahadorani S., and A. J. Hilliker, 2009 Biological and behavioral effects of heavy metals in *Drosophila melanogaster* adults and larvae. J. Insect Behav. 22: 399–411. <https://doi.org/10.1007/s10905-009-9181-4>
- Bahadorani S., S. Mukai, D. Egli, and A. J. Hilliker, 2010 Overexpression of metal-responsive transcription factor (*MTF-1*) in *Drosophila melanogaster* ameliorates life-span reductions associated with oxidative stress and metal toxicity. Neurobiol. Aging 31: 1215–1226. <https://doi.org/10.1016/j.neurobiolaging.2008.08.001>
- Balamurugan K., D. Egli, A. Selvaraj, B. Zhang, O. Georgiev, *et al.*, 2004 Metal-responsive transcription factor (*MTF-1*) and heavy metal stress response in *Drosophila* and mammalian cells: a functional comparison. Biol. Chem. 385. <https://doi.org/10.1515/BC.2004.074>
- Balamurugan K., D. Egli, H. Hua, R. Rajaram, G. Seisenbacher, *et al.*, 2007 Copper homeostasis in *Drosophila* by complex interplay of import, storage and behavioral avoidance. EMBO J. 26: 1035–1044. <https://doi.org/10.1038/sj.emboj.7601543>
- Bálint A. F., M. S. Röder, R. Hell, G. Galiba, and A. Börner, 2007 Mapping of QTLs affecting copper tolerance and the Cu, Fe, Mn and Zn contents in the shoots of wheat seedlings. Biol. Plant. 51: 129–134. <https://doi.org/10.1007/s10535-007-0025-9>

- Bazzicalupo A. L., J. Ruytinx, Y.-H. Ke, L. Coninx, J. V. Colpaert, *et al.*, 2019 Incipient local adaptation in a fungus: evolution of heavy metal tolerance through allelic and copy-number variation. bioRxiv 832089; doi: <https://doi.org/10.1101/832089>
- Beavis W. D., D. Grant, and R. Fincher, 1991 Quantitative trait loci for plant height in four maize populations and their associations with qualitative genetic loci. *Theor. Appl. Genet.* 83: 141–145.
- Bellion M., M. Courbot, C. Jacob, F. Guinet, D. Blaudez, *et al.*, 2007 Metal induction of a *Paxillus involutus* metallothionein and its heterologous expression in *Hebeloma cylindrosporum*. *New Phytol.* 174: 151–158. <https://doi.org/10.1111/j.1469-8137.2007.01973.x>
- Bettedi L., M. F. Aslam, J. Szular, K. Mandilaras, and F. Missirlis, 2011 Iron depletion in the intestines of *Malvolio* mutant flies does not occur in the absence of a multicopper oxidase. *J. Exp. Biol.* 214: 971–978. <https://doi.org/10.1242/jeb.051664>
- Blackney M. J., R. Cox, D. Shepherd, and J. D. Parker, 2014 Cloning and expression analysis of *Drosophila* extracellular Cu Zn superoxide dismutase. *Biosci. Rep.* 34: e00164. <https://doi.org/10.1042/BSR20140133>
- Boyle E. A., Y. I. Li, and J. K. Pritchard, 2017 An expanded view of complex traits: from polygenic to omnigenic. *Cell* 169: 1177–1186. <https://doi.org/10.1016/j.cell.2017.05.038>
- Bray N. L., H. Pimentel, P. Melsted, and L. Pachter, 2016 Near-optimal probabilistic RNA-seq quantification. *Nat. Biotechnol.* 34: 525–527. <https://doi.org/10.1038/nbt.3519>
- Calap-Quintana P., J. González-Fernández, N. Sebastiá-Ortega, J. Llorens, and M. Moltó, 2017 *Drosophila melanogaster* models of metal-related human diseases and metal toxicity. *Int. J. Mol. Sci.* 18: 1456. <https://doi.org/10.3390/ijms18071456>
- Chen S., Y. Zhou, Y. Chen, and J. Gu, 2018 fastp: an ultra-fast all-in-one FASTQ preprocessor. bioRxiv. <https://doi.org/10.1101/274100>
- Cohen J., 1988 *Statistical power for the behavioral sciences*. Lawrence Erlbaum, Hillsdale, NJ.
- Collet J., and S. Fellous, 2019 Do traits separated by metamorphosis evolve independently? Concepts and methods. *Proc. R. Soc. B Biol. Sci.* 286: 20190445. <https://doi.org/10.1098/rspb.2019.0445>
- Courbot M., G. Willems, P. Motte, S. Arvidsson, N. Roosens, *et al.*, 2007 A major quantitative trait locus for cadmium tolerance in *Arabidopsis halleri* colocalizes with *HMA4*, a gene encoding a heavy metal ATPase. *Plant Physiol.* 144: 1052–1065. <https://doi.org/10.1104/pp.106.095133>

- Culotta V. C., L. W. J. Klomp, J. Strain, R. L. B. Casareno, B. Krems, *et al.*, 1997 The copper chaperone for superoxide dismutase. *J. Biol. Chem.* 272: 23469–23472.  
<https://doi.org/10.1074/jbc.272.38.23469>
- Danks D. M., 1988 Copper deficiency in humans. *Annu. Rev. Nutr.* 8: 235–257.  
<https://doi.org/10.1146/annurev.nu.08.070188.001315>
- Domingo A., J. González-Jurado, M. Maroto, C. Díaz, J. Vinos, *et al.*, 1998 Troponin-T is a calcium-binding protein in insect muscle: in vivo phosphorylation, muscle-specific isoforms and developmental profile in *Drosophila melanogaster*. *J. Muscle Res. Cell Motil.* 19: 393–403.
- Ecke F., N. J. Singh, J. M. Arnemo, A. Bignert, B. Helander, *et al.*, 2017 Sublethal lead exposure alters movement behavior in free-ranging golden eagles. *Environ. Sci. Technol.* 51: 5729–5736. <https://doi.org/10.1021/acs.est.6b06024>
- Egli D., A. Selvaraj, H. Yepiskoposyan, B. Zhang, E. Hafen, *et al.*, 2003 Knockout of ‘metal-responsive transcription factor’ *MTF-1* in *Drosophila* by homologous recombination reveals its central role in heavy metal homeostasis. *EMBO J.* 22: 100–108.  
<https://doi.org/10.1093/emboj/cdg012>
- Egli D., H. Yepiskoposyan, A. Selvaraj, K. Balamurugan, R. Rajaram, *et al.*, 2006a A family knockout of all four *Drosophila* metallothioneins reveals a central role in copper homeostasis and detoxification. *Mol. Cell. Biol.* 26: 2286–2296.  
<https://doi.org/10.1128/MCB.26.6.2286-2296.2006>
- Egli D., J. Domènech, A. Selvaraj, K. Balamurugan, H. Hua, *et al.*, 2006b The four members of the *Drosophila* metallothionein family exhibit distinct yet overlapping roles in heavy metal homeostasis and detoxification. *Genes Cells* 11: 647–658.  
<https://doi.org/10.1111/j.1365-2443.2006.00971.x>
- Ehrenreich I. M., N. Torabi, Y. Jia, J. Kent, S. Martis, *et al.*, 2010 Dissection of genetically complex traits with extremely large pools of yeast segregants. *Nature* 464: 1039–1042.  
<https://doi.org/10.1038/nature08923>
- Evans K. S., S. C. Brady, J. S. Bloom, R. E. Tanny, D. E. Cook, *et al.*, 2018 Shared genomic regions underlie natural variation in diverse toxin responses. *Genetics* 210: 1509–1525.  
<https://doi.org/10.1534/genetics.118.301311>
- Everman E. R., C. L. McNeil, J. L. Hackett, C. L. Bain, and S. J. Macdonald, 2019 Dissection of complex, fitness-related traits in multiple *Drosophila* mapping populations offers insight into the genetic control of stress resistance. *Genetics* 211: 19.  
<https://doi.org/10.1534/genetics.119.301930>
- Filshie B. K., D. F. Poulson, and D. F. Waterhouse, 1971 Ultrastructure of the copper accumulating region of the *Drosophila* larval midgut. *Tissue Cell* 3: 77–102.

- Freda P. J., J. T. Alex, T. J. Morgan, and G. J. Ragland, 2017 Genetic decoupling of thermal hardiness across metamorphosis in *Drosophila melanogaster*. *Integr. Comp. Biol.* 57: 999–1009. <https://doi.org/10.1093/icb/ix102>
- Freda P. J., Z. M. Ali, N. Heter, G. J. Ragland, and T. J. Morgan, 2019 Stage-specific genotype-by-environment interactions for cold and heat hardiness in *Drosophila melanogaster*. *Heredity* 123: 479–491. <https://doi.org/10.1038/s41437-019-0236-9>
- Gall J. E., R. S. Boyd, and N. Rajakaruna, 2015 Transfer of heavy metals through terrestrial food webs: a review. *Environ. Monit. Assess.* 187. <https://doi.org/10.1007/s10661-015-4436-3>
- Garlapow M. E., W. Huang, M. T. Yarboro, K. R. Peterson, and T. F. C. Mackay, 2015 Quantitative genetics of food Intake in *Drosophila melanogaster*. *PLoS ONE* 10. <https://doi.org/10.1371/journal.pone.0138129>
- Gaudet P., M. Livstone, and P. Thomas, 2011 Gene Ontology annotation inferences using phylogenetic trees. *Go Ref. Genome Proj.*
- Georgieva S. S., S. P. McGrath, D. J. Hooper, and B. S. Chambers, 2002 Nematode communities under stress: the long-term effects of heavy metals in soil treated with sewage sludge. *Appl. Soil Ecol.* 20: 27–42. [https://doi.org/10.1016/S0929-1393\(02\)00005-7](https://doi.org/10.1016/S0929-1393(02)00005-7)
- Goldsbrough P., 2000 Metal tolerance in plants: The role of phytochelatins and metallothioneins, pp. 227–239 in *Phytoremediation of Contaminated Soil and Water*, CRC Press LLC, Boca Raton, Florida.
- GTEC Consortium, E. R. Gamazon, A. V. Segrè, M. van de Bunt, X. Wen, *et al.*, 2018 Using an atlas of gene regulation across 44 human tissues to inform complex disease- and trait-associated variation. *Nat. Genet.* 50: 956–967. <https://doi.org/10.1038/s41588-018-0154-4>
- Guo Y., K. Smith, J. Lee, D. J. Thiele, and M. J. Petris, 2004 Identification of methionine-rich clusters that regulate copper-stimulated endocytosis of the human *Ctr1* copper transporter. *J. Biol. Chem.* 279: 17428–17433. <https://doi.org/10.1074/jbc.M401493200>
- Guruharsha K. G., J.-F. Rual, B. Zhai, J. Mintseris, P. Vaidya, *et al.*, 2011 A protein complex network of *Drosophila melanogaster*. *Cell* 147: 690–703. <https://doi.org/10.1016/j.cell.2011.08.047>
- Hart E. B., H. Steenbock, J. Waddell, and C. A. Elvehjem, 1928 Iron nutrition. VII copper is a supplement to iron for hemoglobin building in rat. *J. Biol. Chem.* 77: 797–812.
- Harvey P. J., H. K. Handley, and M. P. Taylor, 2016 Widespread copper and lead contamination of household drinking water, New South Wales, Australia. *Environ. Res.* 151: 275–285. <https://doi.org/10.1016/j.envres.2016.07.041>

- Hatori Y., and S. Lutsenko, 2013 An expanding range of functions for the copper chaperone/antioxidant protein Atox1. *Antioxid. Redox Signal.* 19: 945–957. <https://doi.org/10.1089/ars.2012.5086>
- He X., S. Zhou, G. E. St. Armour, T. F. C. Mackay, and R. R. H. Anholt, 2016 Epistatic partners of neurogenic genes modulate *Drosophila* olfactory behavior: Epistatic modifiers for *Drosophila* olfaction. *Genes Brain Behav.* 15: 280–290. <https://doi.org/10.1111/gbb.12279>
- Highfill C. A., G. A. Reeves, and S. J. Macdonald, 2016 Genetic analysis of variation in lifespan using a multiparental advanced intercross *Drosophila* mapping population. *BMC Genet.* 17. <https://doi.org/10.1186/s12863-016-0419-9>
- Highfill C. A., B. M. Baker, S. D. Stevens, R. R. H. Anholt, and T. F. C. Mackay, 2019 Genetics of cocaine and methamphetamine consumption and preference in *Drosophila melanogaster*, (D. G. Heckel, Ed.). *PLOS Genet.* 15: e1007834. <https://doi.org/10.1371/journal.pgen.1007834>
- Huard D. J. E., K. M. Kane, and F. A. Tezcan, 2013 Re-engineering protein interfaces yields copper-inducible ferritin cage assembly. *Nat. Chem. Biol.* 9: 169–176. <https://doi.org/10.1038/nchembio.1163>
- Ilunga Kabeya F., P. Pongrac, B. Lange, M.-P. Faucon, J. T. van Elteren, *et al.*, 2018 Tolerance and accumulation of cobalt in three species of *Haumaniastrum* and the influence of copper. *Environ. Exp. Bot.* 149: 27–33. <https://doi.org/10.1016/j.envexpbot.2018.01.018>
- Janssens T. K. S., D. Roelofs, and N. M. van Straalen, 2009 Molecular mechanisms of heavy metal tolerance and evolution in invertebrates. *Insect Sci.* 16: 3–18. <https://doi.org/10.1111/j.1744-7917.2009.00249.x>
- King E. G., S. J. Macdonald, and A. D. Long, 2012a Properties and power of the *Drosophila* Synthetic Population Resource for the routine dissection of complex traits. *Genetics* 191: 935–949. <https://doi.org/10.1534/genetics.112.138537>
- King E. G., C. M. Merkes, C. L. McNeil, S. R. Hooper, S. Sen, *et al.*, 2012b Genetic dissection of a model complex trait using the *Drosophila* Synthetic Population Resource. *Genome Res.* 22: 1558–1566. <https://doi.org/10.1101/gr.134031.111>
- King E. G., and A. D. Long, 2017 The Beavis effect in next-generation mapping panels in *Drosophila melanogaster*. *G3 Genes Genomes Genet.* 7: 1643–1652.
- Kirby K., L. T. Jensen, J. Binnington, A. J. Hilliker, J. Ulloa, *et al.*, 2008 Instability of superoxide dismutase 1 of *Drosophila* in mutants deficient for its cognate copper chaperone. *J. Biol. Chem.* 283: 35393–35401. <https://doi.org/10.1074/jbc.M807131200>

- Lüdecke D., 2020 *\_sjstats*: Statistical functions for regression models (Version 0.17.9). URL: <https://doi.org/10.5281/zenodo.1284472>
- Lye J. C., C. D. Richards, K. Dechen, C. G. Warr, and R. Burke, 2013 In vivo zinc toxicity phenotypes provide a sensitized background that suggests zinc transport activities for most of the *Drosophila* *Zip* and *ZnT* genes. *JBIC J. Biol. Inorg. Chem.* 18: 323–332. <https://doi.org/10.1007/s00775-013-0976-6>
- Lynch M., and B. Walsh, 1998 *Genetic and Analysis of Quantitative Traits*. Sinauer, Sunderland, MA.
- Lyne R., R. Smith, K. Rutherford, M. Wakeling, A. Varley, *et al.*, 2007 FlyMine: an integrated database for *Drosophila* and *Anopheles* genomics. *Genome Biol.* 8: R129. <https://doi.org/10.1186/gb-2007-8-7-r129>
- Mackay T. F. C., S. Richards, E. A. Stone, A. Barbadilla, J. F. Ayroles, *et al.*, 2012 The *Drosophila melanogaster* Genetic Reference Panel. *Nature* 482: 173–178. <https://doi.org/10.1038/nature10811>
- Macnair M. R., 1983 The genetic control of copper tolerance in the yellow monkey flower, *Mimulus guttatus*. *Heredity* 53: 283–293.
- Macnair M. R., 1993 The genetics of metal tolerance in vascular plants. *New Phytol.* 124: 541–559. <https://doi.org/10.1111/j.1469-8137.1993.tb03846.x>
- MacNair M. R., S. E. Smith, and Q. J. Cumbes, 1993 Heritability and distribution of variation in degree of copper tolerance in *Mimulus guttatus* at Copperopolis, California. *Heredity* 71: 445–455. <https://doi.org/10.1038/hdy.1993.162>
- Maroni G., and D. Watson, 1985 Uptake and binding of cadmium, copper and zinc by *Drosophila melanogaster* larvae. *Insect Biochem.* 15: 55–63.
- Marriage T. N., E. G. King, A. D. Long, and S. J. Macdonald, 2014 Fine-mapping nicotine resistance loci in *Drosophila* using a multiparent advanced generation inter-cross population. *Genetics* 198: 45–57. <https://doi.org/10.1534/genetics.114.162107>
- Martchenko M., S. I. Candille, H. Tang, and S. N. Cohen, 2012 Human genetic variation altering anthrax toxin sensitivity. *Proc. Natl. Acad. Sci.* 109: 2972–2977. <https://doi.org/10.1073/pnas.1121006109>
- Mercer S. W., and R. Burke, 2016 Evidence for a role for the putative *Drosophila* *hGRX1* orthologue in copper homeostasis. *BioMetals* 29: 705–713. <https://doi.org/10.1007/s10534-016-9946-0>
- Mokdad R., A. Debec, and M. Wegnez, 1987 Metallothionein genes in *Drosophila melanogaster* constitute a dual system. *Proc. Natl. Acad. Sci.* 84: 2658–2662.



- Montgomery S. L., D. Vorojeikina, W. Huang, T. F. C. Mackay, R. R. H. Anholt, *et al.*, 2014 Genome-wide association analysis of tolerance to methylmercury toxicity in *Drosophila* implicates myogenic and neuromuscular developmental pathways. *PLOS ONE* 9: 15.
- Moran N. A., 1994 Adaptation and constraint in the complex life cycles of animals. *Annu. Rev. Ecol. Syst.* 25: 573–600.
- Najarro M. A., J. L. Hackett, and S. J. Macdonald, 2017 Loci contributing to boric acid toxicity in two reference populations of *Drosophila melanogaster*. *G3 Genes Genomes Genet.* 7: 1631–1641.
- Navarro J. A., and S. Schneuwly, 2017 Copper and zinc homeostasis: lessons from *Drosophila melanogaster*. *Front. Genet.* 8. <https://doi.org/10.3389/fgene.2017.00223>
- Neuberger J. S., M. Mulhall, M. C. Pomatto, J. Sheverbush, and R. S. Hassanein, 1990 Health problems in Galena, Kansas: a heavy metal mining Superfund site. *Sci. Total Environ.* 94: 261–272.
- Norgate M., E. Lee, A. Southon, A. Farlow, P. Batterham, *et al.*, 2006 Essential roles in development and pigmentation for the *Drosophila* copper transporter *DmATP7*. *Mol. Biol. Cell* 17: 475–484. <https://doi.org/10.1091/mbc.E05-06-0492>
- Norgate M., A. Southon, S. Zou, M. Zhan, Y. Sun, *et al.*, 2007 Copper homeostasis gene discovery in *Drosophila melanogaster*. *BioMetals* 20: 683–697. <https://doi.org/10.1007/s10534-006-9075-2>
- Norgate M., A. Southon, M. Greenough, M. Cater, A. Farlow, *et al.*, 2010 *Syntaxin 5* is required for copper homeostasis in *Drosophila* and mammals, (J. M. Bridger, Ed.). *PLoS ONE* 5: e14303. <https://doi.org/10.1371/journal.pone.0014303>
- Oliveira-Filho E. C. de, R. M. Lopes, and F. J. R. Paumgartten, 2004 Comparative study on the susceptibility of freshwater species to copper-based pesticides. *Chemosphere* 56: 369–374. <https://doi.org/10.1016/j.chemosphere.2004.04.026>
- Ozdowski E. F., Y. M. Mowery, and C. Cronmiller, 2009 *stall* encodes an ADAMTS metalloprotease and interacts genetically with *Delta* in *Drosophila* ovarian follicle formation. *Genetics* 183: 1027–1040. <https://doi.org/10.1534/genetics.109.107367>
- Paradis E., J. Claude, and K. Strimmer, 2004 APE: analysis of phylogenetics and evolution in R language. *Bioinformatics* 20: 289–290.
- Perkins L. A., L. Holderbaum, R. Tao, Y. Hu, R. Sopko, *et al.*, 2015 The transgenic RNAi project at Harvard Medical School: resources and validation. *Genetics* 201: 843–852. <https://doi.org/10.1534/genetics.115.180208>

- Petris M. J., K. Smith, J. Lee, and D. J. Thiele, 2003 Copper-stimulated endocytosis and degradation of the human copper transporter, *hCtr1*. *J. Biol. Chem.* 278: 9639–9646. <https://doi.org/10.1074/jbc.M209455200>
- Pimentel H., N. L. Bray, S. Puente, P. Melsted, and L. Pachter, 2017 Differential analysis of RNA-seq incorporating quantification uncertainty. *Nat. Methods* 14: 687–690. <https://doi.org/10.1038/nmeth.4324>
- Pinheiro J., D. Bates, S. DebRoy, D. Sarkar, and R Core Team, 2019 nlme: linear and nonlinear mixed effects models. R Package Version 3.1-142.
- Plessl C., P. Jandrisits, R. Krachler, B. K. Keppler, and F. Jirsa, 2017 Heavy metals in the mallard *Anas platyrhynchos* from eastern Austria. *Sci. Total Environ.* 580: 670–676. <https://doi.org/10.1016/j.scitotenv.2016.12.013>
- Pölkki M., 2016 The effects of copper exposure on life-history traits in insects. *Ann. Univ. Turku.* 328.
- R Core Team, 2017 *R: A language and environment for statistical computing*. R Foundation for Statistical Computing, Vienna, Austria.
- Ragland G. J., and J. G. Kingsolver, 2008 Evolution of thermotolerance in seasonal environments: the effects of annual temperature variation and life-history timing in *Wyeomyia smithii*. *Evolution* 62: 1345–1357. <https://doi.org/10.1111/j.1558-5646.2008.00367.x>
- Ramirez M., S. Massolo, R. Frache, and J. A. Correa, 2005 Metal speciation and environmental impact on sandy beaches due to El Salvador copper mine, Chile. *Mar. Pollut. Bull.* 50: 62–72. <https://doi.org/10.1016/j.marpolbul.2004.08.010>
- Roelofs D., L. Overheijn, M. E. de Boer, T. K. S. Janssens, and N. M. van Straalen, 2006 Additive genetic variation of transcriptional regulation: metallothionein expression in the soil insect *Orchesella cincta*. *Heredity* 96: 85–92. <https://doi.org/10.1038/sj.hdy.6800756>
- Ruden D. M., L. Chen, D. Possidente, B. Possidente, P. Rasouli, *et al.*, 2009 Genetical toxicogenomics in *Drosophila* identifies master-modulatory loci that are regulated by developmental exposure to lead. *NeuroToxicology* 30: 898–914. <https://doi.org/10.1016/j.neuro.2009.08.011>
- Ryabinina O., E. Subbian, and M. Iordanov, 2006 D-MEKK1, the *Drosophila* orthologue of mammalian *MEKK4/MTKI*, and *Hemipterous/D-MKK7* mediate the activation of D-JNK by cadmium and arsenite in Schneider cells. *BMC Cell Biol.* 7: 7. <https://doi.org/10.1186/1471-2121-7-7>

- Sánchez-Chardi A., and J. Nadal, 2007 Bioaccumulation of metals and effects of landfill pollution in small mammals. Part I. The greater white-toothed shrew, *Crocidura russula*. *Chemosphere* 68: 703–711. <https://doi.org/10.1016/j.chemosphere.2007.01.042>
- Schmidt P. J., C. Kunst, and V. C. Culotta, 2000 Copper activation of superoxide dismutase 1 (SOD1) *in Vivo*: Role for protein-protein interactions with the copper chaperone for SOD1. *J. Biol. Chem.* 275: 33771–33776. <https://doi.org/10.1074/jbc.M006254200>
- Selby J. P., and J. H. Willis, 2018 Major QTL controls adaptation to serpentine soils in *Mimulus guttatus*. *Mol. Ecol.* 27: 5073–5087. <https://doi.org/10.1111/mec.14922>
- Shell B. C., R. E. Schmitt, K. M. Lee, J. C. Johnson, B. Y. Chung, *et al.*, 2018 Measurement of solid food intake in *Drosophila* via consumption-excretion of a dye tracer. *Sci. Rep.* 8: 11536. <https://doi.org/10.1038/s41598-018-29813-9>
- Southon A., R. Burke, M. Norgate, P. Batterham, and J. Camakaris, 2004 Copper homeostasis in *Drosophila melanogaster* S2 cells. *Biochem. J.* 383: 303–309. <https://doi.org/10.1042/BJ20040745>
- Southon A., A. Farlow, M. Norgate, R. Burke, and J. Camakaris, 2008 Malvolio is a copper transporter in *Drosophila melanogaster*. *J. Exp. Biol.* 211: 709–716. <https://doi.org/10.1242/jeb.014159>
- Strub B. R., T. L. Parkes, S. T. Mukai, S. Bahadorani, A. B. Coulthard, *et al.*, 2008 Mutations of the *withered* (*whd*) gene in *Drosophila melanogaster* confer hypersensitivity to oxidative stress and are lesions of the *carnitine palmitoyltransferase I* (*CPT I*) gene, (J. Bell, Ed.). *Genome* 51: 409–420. <https://doi.org/10.1139/G08-023>
- Stuart G. W., P. F. Searle, and R. D. Palmiter, 1985 Identification of multiple metal regulatory elements in mouse metallothionein-I promoter by assaying synthetic sequences. *Nature* 317: 828–831. <https://doi.org/10.1038/317828a0>
- Tchounwou P. B., C. Newsome, J. Williams, and K. Glass, 2008 Copper-induced cytotoxicity and transcriptional activation of stress genes in human liver carcinoma (HepG2) cells. *Met. Ions Biol. Med.* 10: 285–290.
- Terhzaz S., P. Cabrero, V. R. Chintapalli, S.-A. Davies, and J. A. T. Dow, 2010 Mislocalization of mitochondria and compromised renal function and oxidative stress resistance in *Drosophila SesB* mutants. *Physiol. Genomics* 41: 33–41. <https://doi.org/10.1152/physiolgenomics.00147.2009>
- Thurmond J., J. L. Goodman, V. B. Strelets, H. Attrill, L. S. Gramates, *et al.*, 2019 FlyBase 2.0: the next generation. *Nucleic Acids Res.* 47: D759–D765. <https://doi.org/10.1093/nar/gky1003>

- Turner T. L., E. C. Bourne, E. J. Von Wettberg, T. T. Hu, and S. V. Nuzhdin, 2010 Population resequencing reveals local adaptation of *Arabidopsis lyrata* to serpentine soils. *Nat. Genet.* 42: 260–263. <https://doi.org/10.1038/ng.515>
- Turski M. L., and D. J. Thiele, 2007 *Drosophila Ctr1A* functions as a copper transporter essential for development. *J. Biol. Chem.* 282: 24017–24026. <https://doi.org/10.1074/jbc.M703792200>
- Uriu-Adams J. Y., and C. L. Keen, 2005 Copper, oxidative stress, and human health. *Mol. Aspects Med.* 26: 268–298. <https://doi.org/10.1016/j.mam.2005.07.015>
- Usmani J. M., 2011 Accumulation of heavy metals in fishes: a human health concern. *Int. J. Environ. Sci.* 2: 671–682.
- Wang X., and L. Kruglyak, 2014 Genetic basis of haloperidol resistance in *Saccharomyces cerevisiae* is complex and dose dependent, (G. P. Copenhaver, Ed.). *PLoS Genet.* 10: e1004894. <https://doi.org/10.1371/journal.pgen.1004894>
- Willems G., D. B. Dräger, M. Courbot, C. Godé, N. Verbruggen, *et al.*, 2007 The genetic basis of zinc tolerance in the metallophyte *Arabidopsis halleri* ssp. *halleri* (Brassicaceae): An analysis of quantitative trait loci. *Genetics* 176: 659–674. <https://doi.org/10.1534/genetics.106.064485>
- World Health Organization, Food and Agriculture Organization of the United Nations, and International Atomic Energy Agency (Eds.), 1996 *Trace elements in human nutrition and health*. World Health Organization, Geneva.
- Wright K. M., U. Hellsten, C. Xu, A. L. Jeong, A. Sreedasyam, *et al.*, 2015 Adaptation to heavy-metal contaminated environments proceeds via selection on pre-existing genetic variation. <http://biorxiv.org/lookup/doi/10.1101/029900>
- Wu L., A. D. Bradshaw, and D. A. Thurman, 1975 The potential for evolution of heavy metal tolerance in plants. III. The rapid evolution of copper tolerance in *Agrostis stolonifera*. *Heredity* 34: 165–187.
- Wuana R. A., and F. E. Okieimen, 2011 Heavy metals in contaminated soils: a review of sources, chemistry, risks and best available strategies for remediation. *ISRN Ecol.* 2011: 1–20. <https://doi.org/10.5402/2011/402647>
- Yepiskoposyan H., D. Egli, T. Fergestad, A. Selvaraj, C. Treiber, *et al.*, 2006 Transcriptome response to heavy metal stress in *Drosophila* reveals a new zinc transporter that confers resistance to zinc. *Nucleic Acids Res.* 34: 4866–4877. <https://doi.org/10.1093/nar/gkl606>

- Yin S., Q. Qin, and B. Zhou, 2017 Functional studies of *Drosophila* zinc transporters reveal the mechanism for zinc excretion in Malpighian tubules. *BMC Biol.* 15: 12.  
<https://doi.org/10.1186/s12915-017-0355-9>
- Zhou H., K. M. Cadigan, and D. J. Thiele, 2003 A Copper-regulated transporter required for copper acquisition, pigmentation, and specific stages of development in *Drosophila melanogaster*. *J. Biol. Chem.* 278: 48210–48218.  
<https://doi.org/10.1074/jbc.M309820200>
- Zhou S., T. V. Morozova, Y. N. Hussain, S. E. Luoma, L. McCoy, *et al.*, 2016 The genetic basis for variation in sensitivity to lead toxicity in *Drosophila melanogaster*. *Environ. Health Perspect.* 124. <https://doi.org/10.1289/ehp.1510513>
- Zhou S., S. E. Luoma, G. E. St. Armour, E. Thakkar, T. F. C. Mackay, *et al.*, 2017 A *Drosophila* model for toxicogenomics: Genetic variation in susceptibility to heavy metal exposure, (G. P. Copenhaver, Ed.). *PLOS Genet.* 13: e1006907.  
<https://doi.org/10.1371/journal.pgen.1006907>

## Supplemental Figures

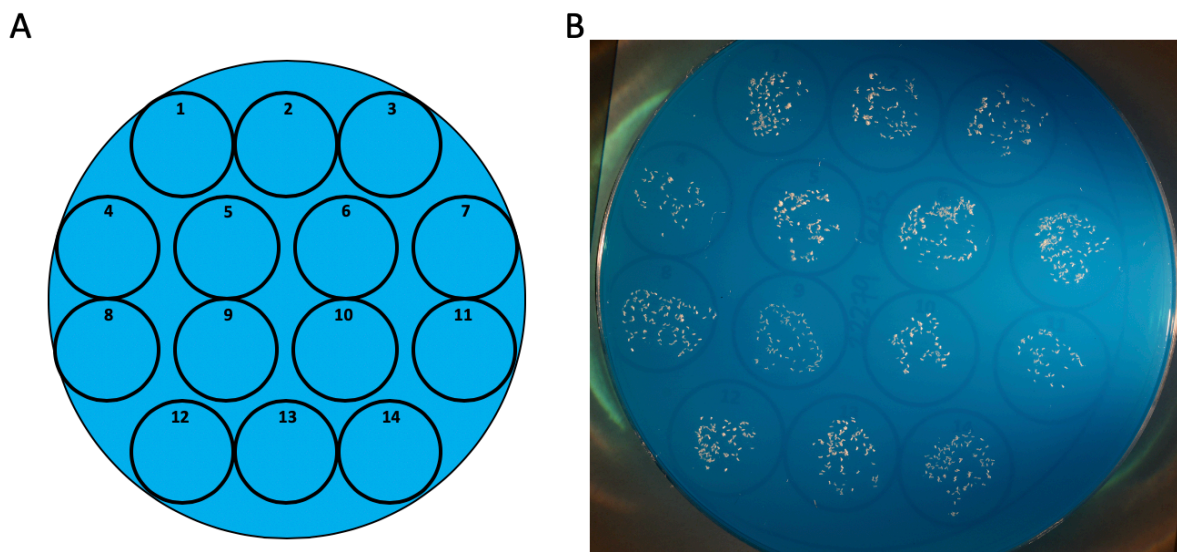

**Figure S1.** Embryos from each strain were arrayed on a 100mm petri dish containing 2% agar with dye for contrast. A. Template used for arraying embryos. B. An example of embryos arranged in each cell of the template. After taking a picture of each dish, embryos were transferred to vials containing water or 2mM  $\text{CuSO}_4$ . All embryos from each cell on the template were transferred to one vial, resulting in up to 7 control vials and 7 copper vials per strain.

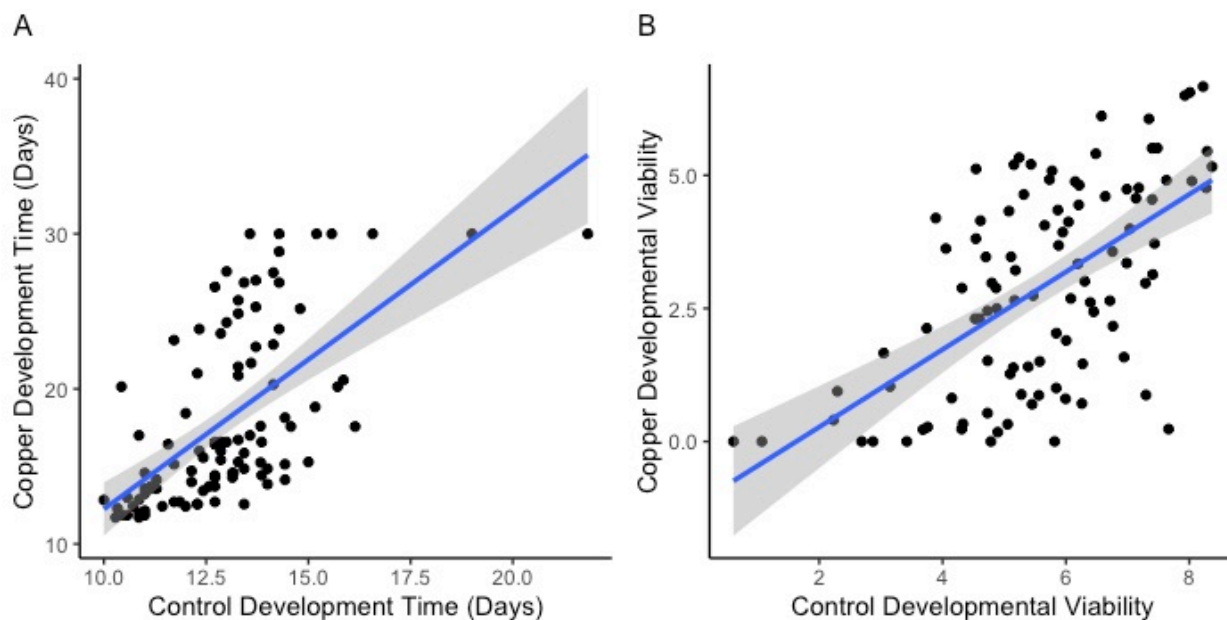

**Figure S2.** Correlation between developmental responses on control and copper media. A. Development time on control food was correlated development time on copper food ( $F_{(1,98)} = 61.0$ ,  $P < 0.0001$ ,  $R^2 = 38\%$ ). Vials in which no individuals emerged were given a value of 30 days. B Square root transformed developmental viability on control and 2mM  $\text{CuSO}_4$  was also correlated ( $F_{(1,98)} = 57.1$ ,  $P < 0.0001$ ,  $R^2 = 36\%$ ). Each point represents the strain mean response. Grey shading indicates the 95% CI of the regression.

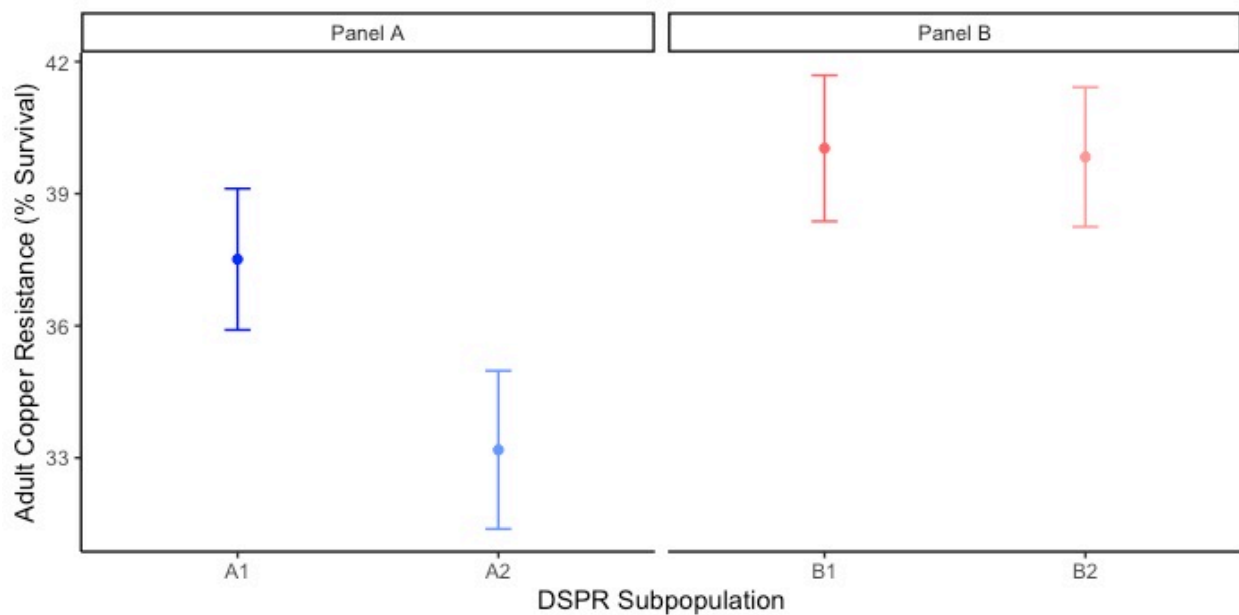

**Figure S3.** Mean ( $\pm$  95% CI) female copper resistance per subpanel. Subpanel influenced percent survival in the pA ( $F_{1,2289} = 12.64$ ;  $p < 0.001$ ) but not pB panel ( $F_{1,2495} = 0.03$ ;  $p = 0.86$ ).



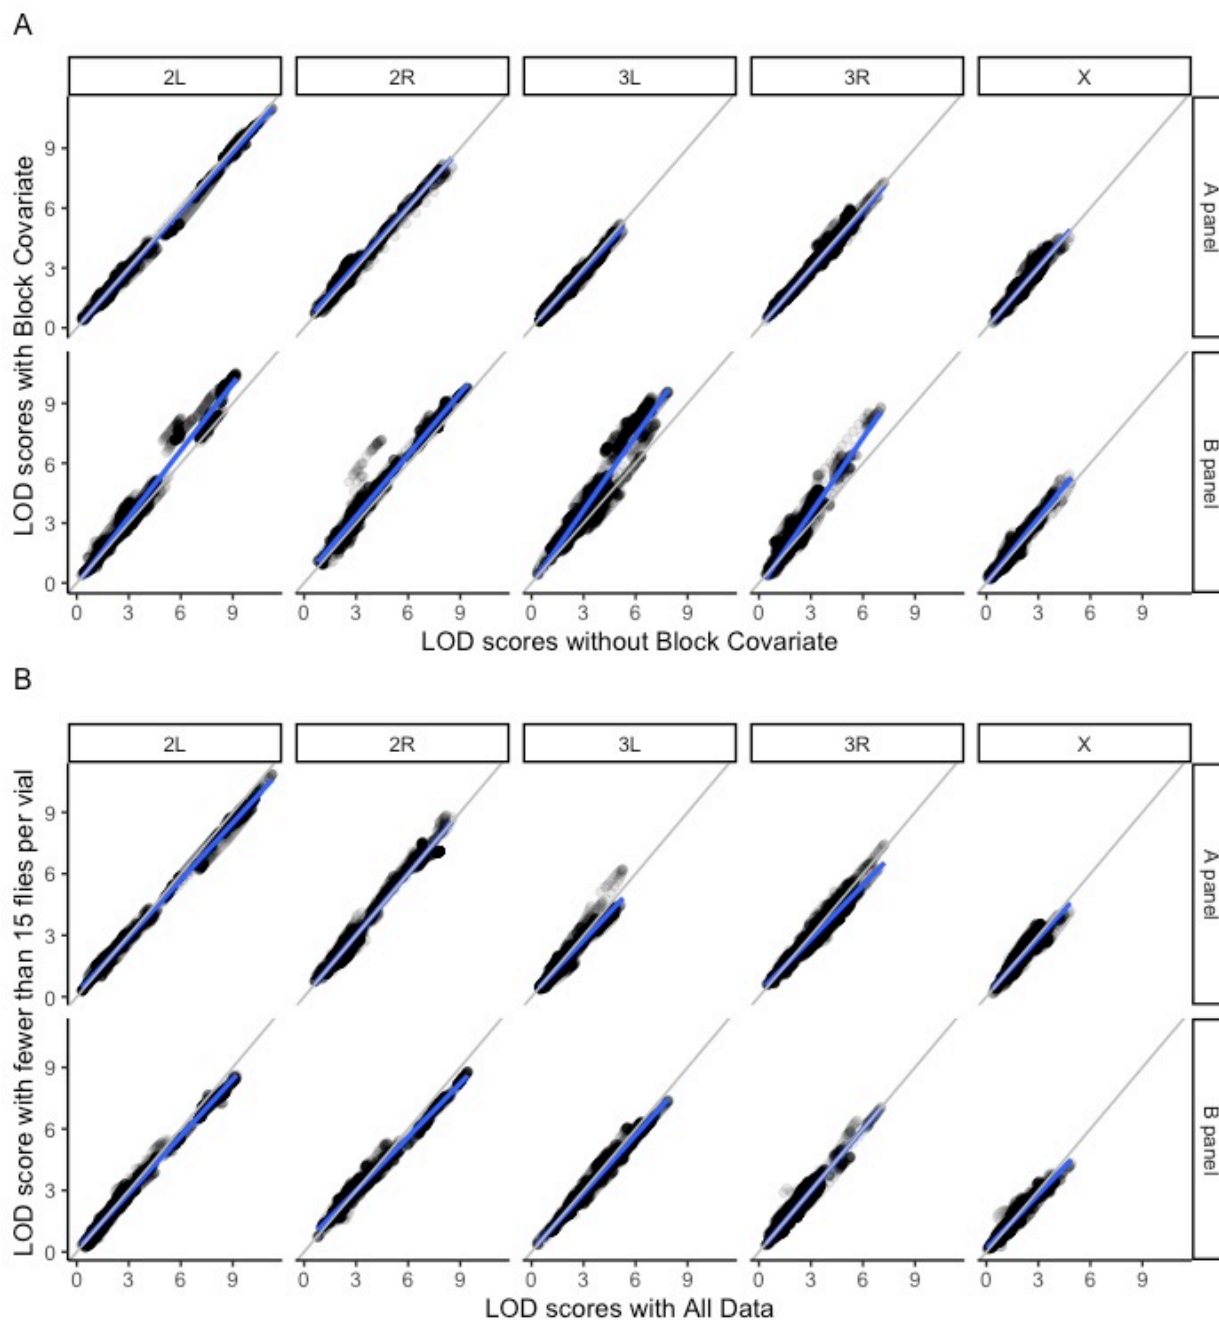

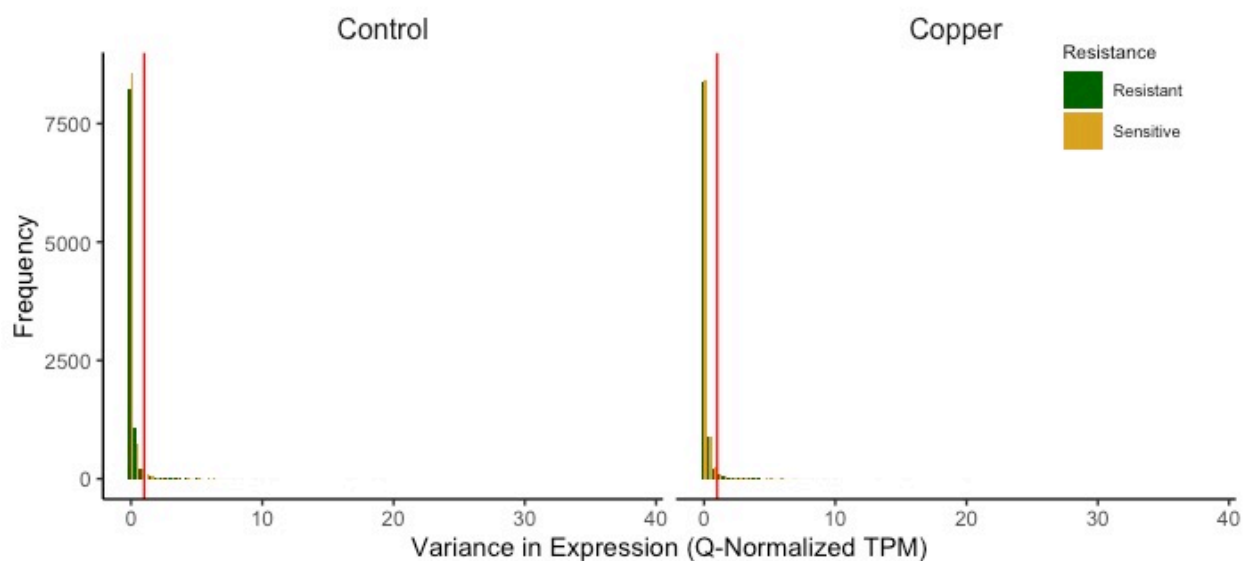

**Figure S5.** Variance in quantile-normalized TPM by within each sample group (resistant vs. sensitive) and treatment group (copper vs. control). The red vertical line indicates the cutoff of 1. All genes with a variance equal to or greater than 1 were excluded from all downstream analyses of DE gene from the three DE models.

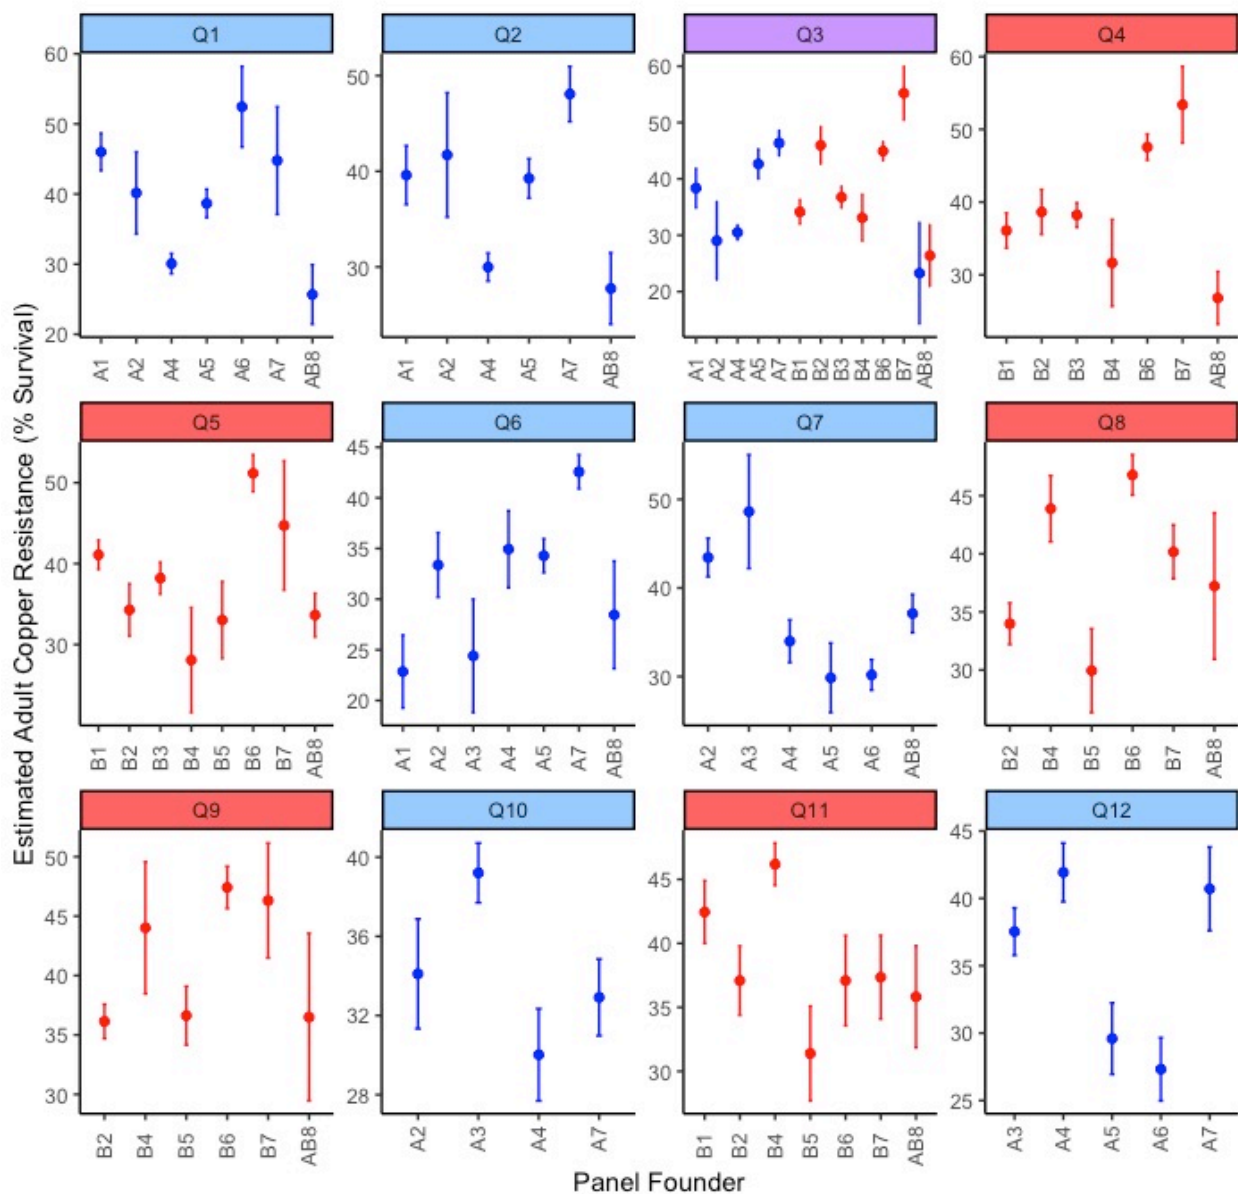

**Figure S6.** Estimated founder haplotype effects at each QTL associated with adult copper resistance. Data are presented as estimated founder means ( $\pm$ SE) when the founder haplotype was present in more than 7 DSPR strains. Plots are colored by panel; panel A is plotted in blue, panel B is plotted in blue. Purple indicates the shared QTL (Q3) between the A and B panels.

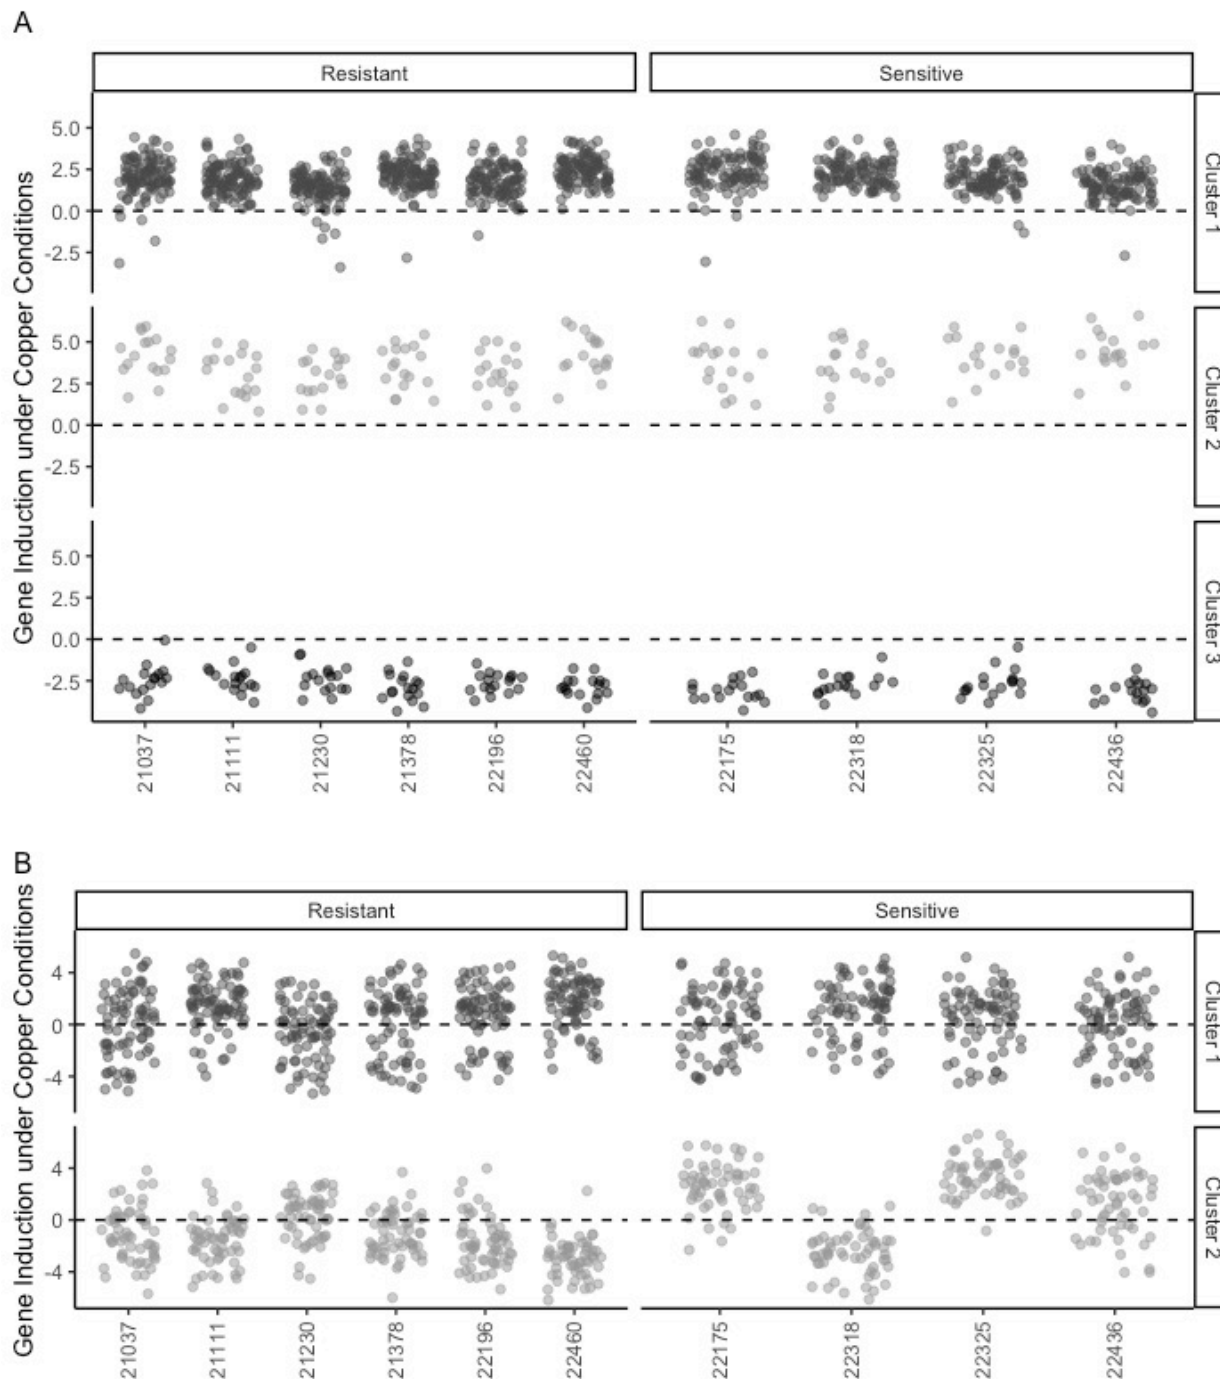

**Figure S7.** Clust analysis of genes influenced by treatment (A) or resistance class (B). A. Clust identified 3 clusters from genes with DE due to treatment. 17 genes from cluster 1 were also implicated by adult copper resistance QTL; one gene was also implicated by copper-specific developmental viability QTL Q15. From treatment clusters 2 and 3, 2 and 4 genes, respectively, were also implicated by adult copper resistance QTL. B. Clust identified 2 clusters from genes with DE due to resistance class. In cluster1, 11 genes were also implicated by adult copper resistance QTL; 4 genes from cluster 2 were also implicated by adult copper resistance QTL. One gene from cluster 2 was implicated by copper-specific developmental viability QTL Q15 as well. Points are shaded to help distinguish clusters.

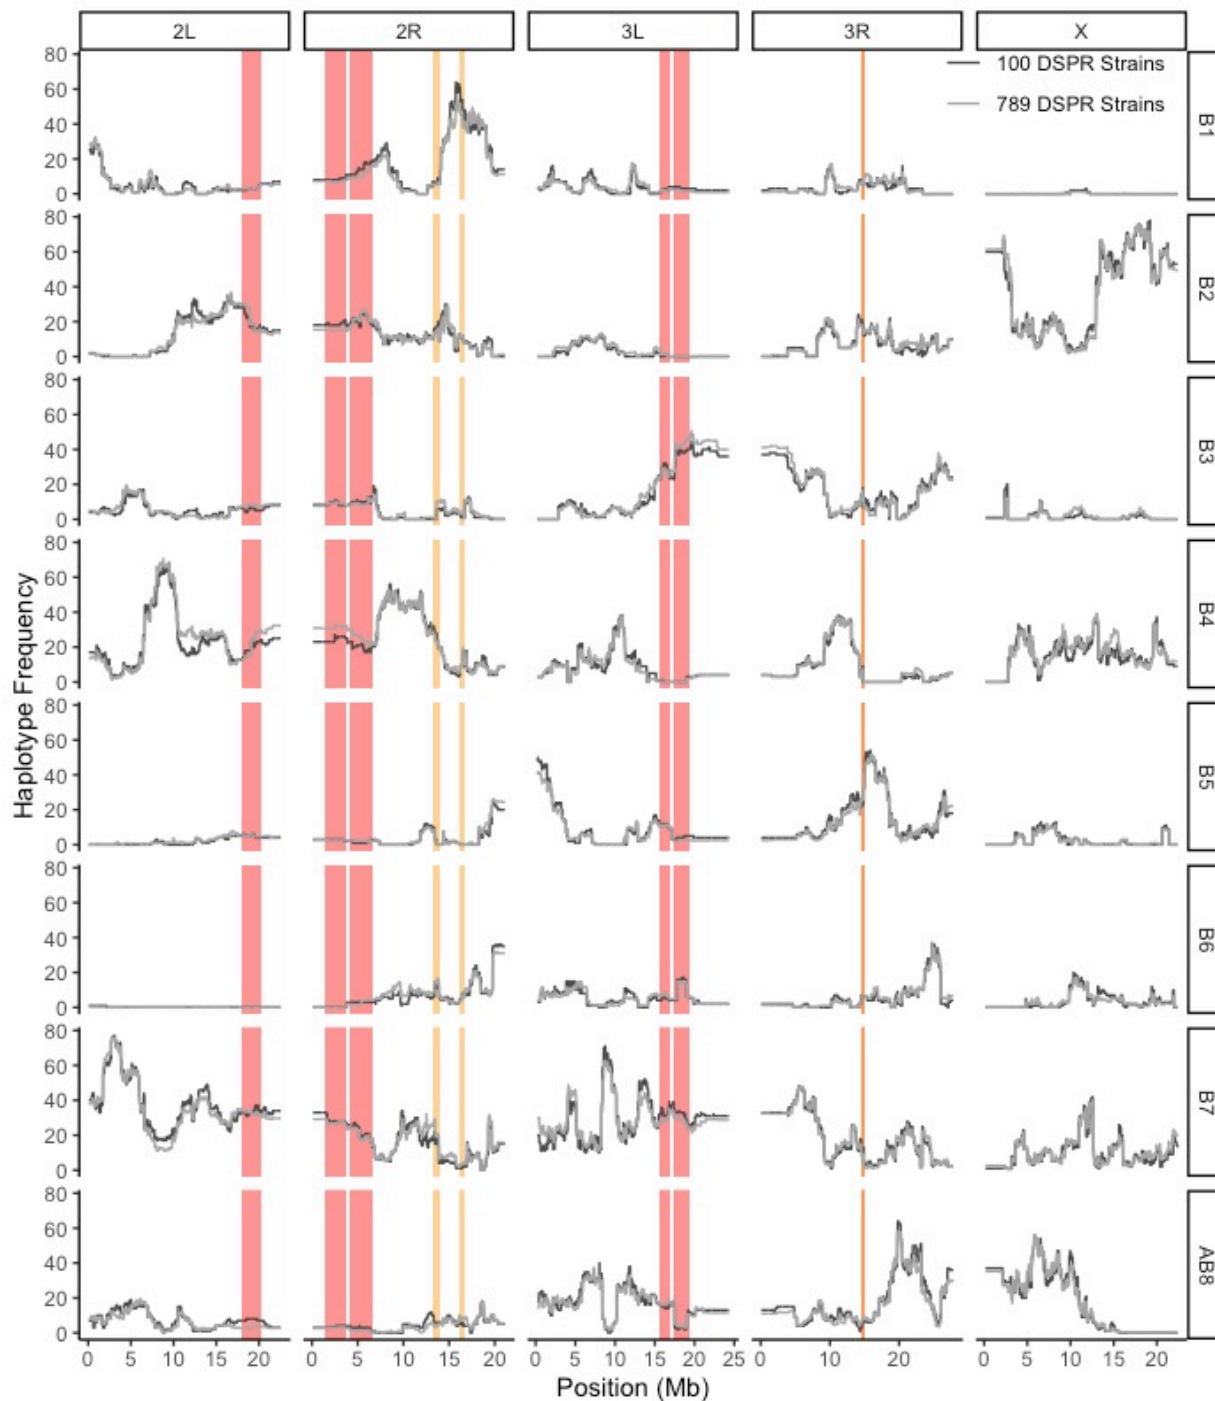

**Figure S8.** Founder haplotype frequencies are shown at each marker position (every 10,000 bp) through the genome for the 789 DSPR strains sampled for the adult copper resistance phenotype (light grey) and the 100 DSPR strains sampled for the copper-specific developmental viability phenotype (dark grey). Representation of founder haplotypes in the DSPR strains sampled for the developmental phenotype is similar to founder haplotype representation in the 789 strains sampled for the adult phenotype. In each panel, QTL intervals for adult copper resistance and copper-specific developmental viability are shown as red and yellow bars, respectively.

## Supplemental Tables

**Table S1.** Correlations between standards across each of plate and block were high and consistent.

|           | block1_P1 | block1_P2 | block1_P3 | block2_P1 | block2_P2 | block2_P3 | block3_P1 | block3_P2 | block3_P3 |
|-----------|-----------|-----------|-----------|-----------|-----------|-----------|-----------|-----------|-----------|
| block1_P1 | --        | 99.99     | 99.99     | 99.97     | 99.97     | 99.91     | 99.96     | 99.94     | 99.94     |
| block1_P2 |           | --        | 99.99     | 99.98     | 99.98     | 99.90     | 99.97     | 99.96     | 99.96     |
| block1_P3 |           |           | --        | 99.98     | 99.98     | 99.92     | 99.97     | 99.95     | 99.96     |
| block2_P1 |           |           |           | --        | 99.99     | 99.86     | 99.99     | 99.98     | 99.97     |
| block2_P2 |           |           |           |           | --        | 99.87     | 99.98     | 99.97     | 99.97     |
| block2_P3 |           |           |           |           |           | --        | 99.84     | 99.86     | 99.88     |
| block3_P1 |           |           |           |           |           |           | --        | 99.98     | 99.97     |
| block3_P2 |           |           |           |           |           |           |           | --        | 99.99     |
| block3_P3 |           |           |           |           |           |           |           |           | --        |

**Table S2.** Summary of analysis of variance and regressions.

**A. Effect of DSPR strain on development time**

| Source      | df  | SS    | MS    | F value | P value   |
|-------------|-----|-------|-------|---------|-----------|
| DSPR Strain | 99  | 1573  | 15.89 | 31.61   | < 0.00001 |
| Residuals   | 579 | 291.1 | 0.50  |         |           |

**B. Effect of DSPR strain on developmental viability**

| Source      | df  | SS   | MS    | F value | P value   |
|-------------|-----|------|-------|---------|-----------|
| DSPR Strain | 99  | 2046 | 20.66 | 11.77   | < 0.00001 |
| Residuals   | 579 | 1016 | 1.75  |         |           |

**C. Correlation between copper and control development time**

| Source    | df | SS   | MS   | F value | P value   |
|-----------|----|------|------|---------|-----------|
| Treatment | 1  | 1214 | 1214 | 61.0    | < 0.00001 |
| Residuals | 98 | 1950 | 19.9 |         |           |

**D. Correlation between copper and control developmental viability**

| Source    | df | SS    | MS    | F value | P value   |
|-----------|----|-------|-------|---------|-----------|
| Treatment | 1  | 128.4 | 128.4 | 54.1    | < 0.00001 |
| Residuals | 98 | 232.8 | 2.38  |         |           |

**E. Variation in adult copper resistance among DSPR Mapping Panel A**

| Source           | df   | SS      | MS      | F value | P value |
|------------------|------|---------|---------|---------|---------|
| Subpanel         | 1    | 10621   | 10620.7 | 12.64   | < 0.001 |
| Batch            | 5    | 38679   | 7735.8  | 9.20    | < 0.001 |
| Subpanel x Batch | 2    | 919     | 459.5   | 0.55    | 0.58    |
| Residuals        | 2289 | 1923750 | 840.4   |         |         |

**F. Variation in adult copper resistance among DSPR Mapping Panel B**

| Source           | df   | SS      | MS     | F value | P value |
|------------------|------|---------|--------|---------|---------|
| Subpanel         | 1    | 25      | 24.5   | 0.03    | 0.86    |
| Batch            | 5    | 30334   | 6066.7 | 7.18    | < 0.001 |
| Subpanel x Batch | 3    | 2774    | 924.6  | 1.09    | 0.35    |
| Residuals        | 2495 | 2107619 | 844.7  |         |         |

**G. Effect of dye consumption in 95 DSPR strain**

| Source                  | df  | SS      | MS      | F value | P value   |
|-------------------------|-----|---------|---------|---------|-----------|
| DSPR Strain             | 94  | 4.46e-5 | 4.70e-7 | 3.08    | < 0.00001 |
| Treatment               | 1   | 3.55e-4 | 3.55e-4 | 2306    | < 0.00001 |
| DSPR Strain x Treatment | 94  | 4.01e-5 | 4.30e-7 | 2.77    | < 0.00001 |
| Residuals               | 348 | 5.36e-5 | 1.5e-7  |         |           |

**H. effect of adult copper resistance on dye consumption**

| Source    | Estimate | SE       | t value | P value   |
|-----------|----------|----------|---------|-----------|
| Intercept | 1.80e-03 | 7.26e-05 | 24.8    | < 0.00001 |

|                                     |           |          |       |           |
|-------------------------------------|-----------|----------|-------|-----------|
| Adult Copper Resistance             | 1.80e-06  | 1.35e-06 | 1.31  | 0.19      |
| Treatment                           | -1.40e-03 | 1.03e-04 | -14.0 | < 0.00001 |
| Adult Copper Resistance x Treatment | -4.24e-06 | 1.91e-06 | -2.22 | 0.027     |

#### I. Effect of copper on development time

| Source                  | df   | SS    | MS    | F value | P value   |
|-------------------------|------|-------|-------|---------|-----------|
| DSPR Strain             | 99   | 15505 | 156.6 | 24.21   | < 0.00001 |
| Treatment               | 1    | 8366  | 8366  | 1293    | < 0.00001 |
| DSPR Strain x Treatment | 99   | 7525  | 76.0  | 11.75   | < 0.00001 |
| Residuals               | 1157 | 7485  | 6.5   |         |           |

#### J. effect of copper on developmental viability

| Source                  | df   | SS    | MS    | F value | P value   |
|-------------------------|------|-------|-------|---------|-----------|
| DSPR Strain             | 99   | 3169  | 32.01 | 49.17   | < 0.00001 |
| Treatment               | 1    | 2543  | 2543  | 3905    | < 0.00001 |
| DSPR Strain x Treatment | 99   | 846.0 | 8.55  | 13.13   | < 0.00001 |
| Residuals               | 1157 | 753.3 | 0.65  |         |           |

#### K. correlation between copper-specific development time and copper-specific developmental viability

| Source                           | df | SS    | MS    | F value | P value   |
|----------------------------------|----|-------|-------|---------|-----------|
| Copper-specific Development Time | 1  | 102.0 | 102.0 | 76.4    | < 0.00001 |
| Residuals                        | 98 | 130.8 | 1.34  |         |           |

#### L. Correlation between adult copper resistance and copper-specific development time

| Source                  | Estimate | SE   | t value | P value |
|-------------------------|----------|------|---------|---------|
| Intercept               | 0.32     | 0.91 | 0.35    | 0.72    |
| Adult Copper Resistance | -0.0006  | 0.02 | -0.40   | 0.69    |

#### M. Correlation between adult copper resistance and copper-specific developmental viability

| Source                  | Estimate | SE    | t value | P value |
|-------------------------|----------|-------|---------|---------|
| Intercept               | -0.45    | 0.31  | -1.44   | 0.15    |
| Adult Copper Resistance | 0.009    | 0.006 | 1.65    | 0.10    |

#### N. Correlation between estimated haplotype effects

| Source                     | df | SS   | MS   | F value | P value |
|----------------------------|----|------|------|---------|---------|
| Estimated Haplotype Effect | 1  | 3.41 | 3.41 | 7.11    | 0.04    |
| Residuals                  | 5  | 2.40 | 0.48 |         |         |



**Table S3.** RNAi stocks for candidate genes.

| Gene           | Stock ID                           | Association in This Study | Proposed Metal Association                                   | Driver     | N  |
|----------------|------------------------------------|---------------------------|--------------------------------------------------------------|------------|----|
| <i>trpl</i>    | RRID:BDSC_26722                    | Q5B, RNAseq               | Mn (Gaudet et al. 2011)                                      | Ubiquitous | 17 |
|                |                                    |                           |                                                              | Midgut     | 18 |
| <i>CG5235</i>  | RRID:BDSC_27694<br>RRID:BDSC_66964 | Q8B, RNAseq               | Cu (Gaudet et al. 2011)                                      | Ubiquitous | 18 |
|                |                                    |                           |                                                              | Midgut     | 18 |
|                |                                    |                           |                                                              | Ubiquitous | 11 |
|                |                                    |                           |                                                              | Midgut     | 18 |
| <i>ZnT41F</i>  | RRID:BDSC_65382<br>RRID:BDSC_28638 | Q4B                       | Zn (Lye et al. 2013)                                         | Ubiquitous | 11 |
|                |                                    |                           |                                                              | Midgut     | 16 |
|                |                                    |                           |                                                              | Ubiquitous | 17 |
|                |                                    |                           |                                                              | Midgut     | 18 |
| <i>MtnC</i>    | RRID:BDSC_53292<br>RRID:BDSC_63008 | RNAseq                    | Cu, Zn, Cd (Egli et al. 2006a; Calap-Quintana et al. 2017)   | Ubiquitous | NA |
|                |                                    |                           |                                                              | Midgut     | 17 |
|                |                                    |                           |                                                              | Ubiquitous | 12 |
|                |                                    |                           |                                                              | Midgut     | 18 |
| <i>Catsup</i>  | RRID:BDSC_55396                    | Q3A                       | Zn (Lye et al. 2013)                                         | Ubiquitous | 4  |
|                |                                    |                           |                                                              | Midgut     | 18 |
| <i>CG11825</i> | RRID:BDSC_58199                    | Q5B                       | Cu (Norgate et al. 2007)                                     | Ubiquitous | 8  |
|                |                                    |                           |                                                              | Midgut     | 17 |
| <i>Ccs</i>     | RRID:BDSC_62919                    | Q5B                       | Cu, Zn (Kirby et al. 2008; Gaudet et al. 2011)               | Ubiquitous | 12 |
|                |                                    |                           |                                                              | Midgut     | 18 |
| <i>Sod1</i>    | RRID:BDSC_34616                    | NA                        | Cu, Zn (Gaudet et al. 2011)                                  | Ubiquitous | 17 |
|                |                                    |                           |                                                              | Midgut     | 18 |
| <i>Sod2</i>    | RRID:BDSC_32496                    |                           |                                                              | Ubiquitous | 17 |
|                |                                    |                           |                                                              | Midgut     | 18 |
| <i>whd</i>     | RRID:BDSC_33635                    | Q5B, RNAseq               | Fe, Cd (Strub et al. 2008)                                   | Ubiquitous | 18 |
|                |                                    |                           |                                                              | Midgut     | 18 |
| <i>DCP2</i>    | RRID:BDSC_34806                    | Q8B                       | Mn (Thurmond et al. 2019)                                    | Ubiquitous | 17 |
|                |                                    |                           |                                                              | Midgut     | 18 |
| <i>CG10505</i> | RRID:BDSC_38317                    | RNAseq                    | Cu, Zn, Cd (Yepiskoposyan et al. 2006; Thurmond et al. 2019) | Ubiquitous | 16 |
|                |                                    |                           |                                                              | Midgut     | 18 |
| <i>babo</i>    | RRID:BDSC_40866                    | Q5B                       | (Thurmond et al. 2019)                                       | Ubiquitous | 15 |
|                |                                    |                           |                                                              | Midgut     | 18 |
| <i>swm</i>     | RRID:BDSC_52935                    | Q3B                       | (Thurmond et al. 2019)                                       | Ubiquitous | NA |
|                |                                    |                           |                                                              | Midgut     | 13 |

---

|            |                 |             |                                                           |                      |          |
|------------|-----------------|-------------|-----------------------------------------------------------|----------------------|----------|
| <i>Mvl</i> | RRID:BDSC_55316 | RNAseq      | Fe, Cu, Mn, Cd (Southon et al. 2008; Bettedi et al. 2011) | Ubiquitous<br>Midgut | 14<br>18 |
| <i>stl</i> | RRID:BDSC_57811 | Q7A, RNAseq | Zn (Ozdowski et al. 2009)                                 | Ubiquitous<br>Midgut | 18<br>18 |

---

**Table S4.** Genes mapped to regions associated with each QTL. Data from FlyBase release FB2020\_01. Grey text indicates non-protein coding genes. Red text indicates genes that overlap between QTL intervals.

See additional file Supplemental Table 4

**Table S5.** DE genes identified with the resistance class model ( $\sim$  TRT + RES vs. reduced model:  $\sim$  TRT), treatment model ( $\sim$  TRT + RES vs. reduced model:  $\sim$  RES), and the full model ( $\sim$  TRT + RES vs reduced model:  $\sim$  1). Gene position data is from FlyBase release FB2020\_01.

See additional file Supplemental Table 5

**Table S6.** GO terms and associated gene IDs identified for the DE genes from the full model ( $\sim$  TRT + RES vs reduced model:  $\sim$  1), treatment model ( $\sim$  TRT + RES vs. reduced model:  $\sim$  RES), resistance model ( $\sim$  TRT + RES vs. reduced model:  $\sim$  TRT), and the clusters formed for the treatment and resistance sets of DE genes. GO analysis was performed using FlyMine.

See additional file Supplemental Table 6

## Supplemental Files

File S1. README file for datafiles accompanying this study.
